# Supplementary material for: Evaluating cognitive and affective abilities among medical students: behavioural and medicolegal perspectives
Source: PeerJ. 2024 Feb 2;12:e16864. doi: 10.7717/peerj.16864 (PMC10840496; doi:10.7717/peerj.16864)
Supplement: Supplemental Information 3 [file peerj-12-16864-s003.xlsx]

## Sheet: All responses of the participan
Timestamp	Do you agree to participate in the survey	Age	sex	Original residence before university admission	country	College	Level of education	Level for undergraduate (which year in the faculty?)	Specialty	Do you live with your family or in a different city?	If you live in a different city?	Do you have any chronic illness	Type of chronic disease	Difficulty in remembering details	Difficulty in following directions (particularly oral)	Easily distracted	Does not remember what was just heard or read	Difficulty in developing a timeline for assignments	Difficulty in knowing where to start tasks	Difficult time estimation/ judgment	Has good ideas, but does not follow through	Difficulty in organizing stuff	Difficulty in expressing ideas	Difficulty in maintaining a sequence	Difficulty in problem solving	Difficulty in considering another person's perspective	Difficulty in handling criticism	Unaware of errors in work	Difficulty in expressing myself when embarrassing situation?	Overacting	Difficulty in calming down and working	Cries easily	Frequent mood changes	Low frustration tolerance	Short attention span	Overwhelmed by length/complexity of tasks to be done	Rushing through work	Difficulty in noticing details	Forgets assignments or materials to complete them	Being provoked, I may react aggressively	If I have to resort to violence to protect my rights, I will.	I can think of hurting another person for no reason	I have threatened people I know	I have become so mad that I have broken things	I tell my friends openly when I disagree with them	I often find myself disagreeing with people.	When people annoy me, I may tell them what I think of them	I can not stop arguments when people disagree with me	My friends say that I am somewhat argumentative
2022/09/09 10:27:40 PM GMT+3	Yes	22	Female	City	Jordan	Medicine	Undergraduate	3	Student	Family		No	No	Frequently	Rarely	Sometimes	Sometimes	Rarely	Rarely	Rarely	Sometimes	Sometimes	Sometimes	Sometimes	Rarely	Rarely	Rarely	Rarely	Rarely	Rarely	Rarely	Sometimes	Sometimes	Sometimes	Rarely	Rarely	Sometimes	Sometimes	Rarely	No	No	No	No	No	Yes	No	Yes	No	No
2022/09/09 10:28:49 PM GMT+3	Yes	20	Female	City	Jordan	Medicine	Undergraduate	3	Student	Another city	Alone	No	No	Sometimes	Rarely	Sometimes	Frequently	Sometimes	Rarely	Rarely	Frequently	Sometimes	Sometimes	Sometimes	Sometimes	Sometimes	Sometimes	Sometimes	Sometimes	Sometimes	Sometimes	Sometimes	Frequently	Frequently	Sometimes	Sometimes	Sometimes	Rarely	Frequently	Yes	Yes	No	Yes	Yes	Yes	Yes	No	Yes	Yes
2022/09/09 10:28:57 PM GMT+3	Yes	20	Female	City	Jordan	Medicine	Undergraduate	3	Student	Family		No	No	Sometimes	Rarely	Sometimes	Sometimes	Sometimes	Frequently	Sometimes	Frequently	Sometimes	Sometimes	Rarely	Rarely	Rarely	Rarely	Rarely	Sometimes	Rarely	Rarely	Sometimes	Rarely	Rarely	Sometimes	Sometimes	Sometimes	Sometimes	Rarely	No	No	No	No	No	Yes	No	No	No	No
2022/09/09 10:30:40 PM GMT+3	Yes	19	Female	City	Jordan	Medicine	Undergraduate	3	Student	Family		No	No	Sometimes	Rarely	Sometimes	Sometimes	Rarely	Rarely	Rarely	Frequently	Rarely	Rarely	Sometimes	Sometimes	Sometimes	Sometimes	Rarely	Sometimes	Sometimes	Rarely	Frequently	Sometimes	Rarely	Rarely	Rarely	Frequently	Rarely	Rarely	Yes	Yes	No	No	Yes	Yes	Yes	Yes	No	Yes
2022/09/09 10:31:06 PM GMT+3	Yes	20	Female	City	Jordan	Medicine	Undergraduate	4th	Student	Family		Yes	Others	Rarely	Rarely	Rarely	Rarely	Rarely	Rarely	Sometimes	Rarely	Rarely	Sometimes	Rarely	Rarely	Sometimes	Sometimes	Sometimes	Sometimes	Sometimes	Rarely	Frequently	Frequently	Sometimes	Sometimes	Rarely	Rarely	Rarely	Rarely	Yes	Yes	No	No	No	No	Yes	No	No	No
2022/09/09 10:33:48 PM GMT+3	Yes	20	Female	City	USA	Medicine	Undergraduate	2	Student	Family		No	No	Rarely	Rarely	Sometimes	Rarely	Rarely	Frequently	Sometimes	Frequently	Rarely	Sometimes	Rarely	Sometimes	Rarely	Sometimes	Rarely	Frequently	Sometimes	Rarely	Sometimes	Sometimes	Rarely	Rarely	Sometimes	Sometimes	Rarely	Rarely	Yes	Yes	No	No	No	Yes	No	Yes	No	No
2022/09/09 10:34:03 PM GMT+3	Yes	22	Female	City	Jordan	Medicine	Undergraduate	4th year	Student	Family		No	No	Sometimes	Frequently	Sometimes	Sometimes	Sometimes	Sometimes	Sometimes	Sometimes	Sometimes	Sometimes	Sometimes	Frequently	Sometimes	Sometimes	Sometimes	Frequently	Sometimes	Frequently	Sometimes	Sometimes	Sometimes	Sometimes	Sometimes	Sometimes	Frequently	Sometimes	Yes	No	No	No	No	Yes	No	Yes	Yes	No
2022/09/09 10:34:46 PM GMT+3	Yes	22	Female	City	Others	Medicine	Undergraduate	6th year	Student	Family		Yes	Others	Sometimes	Sometimes	Frequently	Rarely	Sometimes	Sometimes	Sometimes	Sometimes	Rarely	Frequently	Rarely	Rarely	Rarely	Rarely	Rarely	Frequently	Sometimes	Rarely	Rarely	Sometimes	Sometimes	Sometimes	Sometimes	Rarely	Rarely	Rarely	No	No	No	No	No	Yes	Yes	Yes	No	No
2022/09/09 10:34:46 PM GMT+3	Yes	21	Female	City	Jordan	Medicine	Undergraduate	3	Student	Family		No	No	Rarely	Sometimes	Sometimes	Rarely	Rarely	Sometimes	Rarely	Rarely	Sometimes	Rarely	Rarely	Rarely	Rarely	Sometimes	Rarely	Sometimes	Sometimes	Rarely	Sometimes	Rarely	Sometimes	Rarely	Rarely	Rarely	Rarely	Rarely	No	No	No	No	No	Yes	No	No	No	No
2022/09/09 10:35:01 PM GMT+3	Yes	19	Female	City	Jordan	Medicine	Undergraduate	Just finished the first year	Student	Family		No	No	Sometimes	Frequently	Frequently	Frequently	Frequently	Sometimes	Sometimes	Rarely	Frequently	Sometimes	Frequently	Rarely	Sometimes	Rarely	Rarely	Rarely	Rarely	Rarely	Rarely	Sometimes	Sometimes	Frequently	Sometimes	Rarely	Sometimes	Rarely	No	Yes	No	No	Yes	Yes	Yes	Yes	No	No
2022/09/09 10:36:02 PM GMT+3	Yes	22	Female	Countryside	Jordan	Medicine	Undergraduate	5th	Student	Family		No	No	Sometimes	Frequently	Sometimes	Sometimes	Rarely	Rarely	Rarely	Frequently	Rarely	Rarely	Rarely	Rarely	Rarely	Sometimes	Rarely	Rarely	Rarely	Rarely	Rarely	Sometimes	Rarely	Sometimes	Sometimes	Rarely	Rarely	Rarely	No	No	No	No	No	Yes	Yes	No	No	No
2022/09/09 10:36:50 PM GMT+3	Yes	23	Female	City	Jordan	Medicine	Undergraduate	6	Student	Family		No	No	Sometimes	Rarely	Sometimes	Rarely	Rarely	Rarely	Rarely	Rarely	Rarely	Rarely	Rarely	Rarely	Rarely	Rarely	Sometimes	Frequently	Rarely	Sometimes	Sometimes	Sometimes	Rarely	Rarely	Frequently	Frequently	Sometimes	Rarely	No	Yes	No	No	No	No	No	No	No	No
2022/09/09 10:37:30 PM GMT+3	Yes	21	Female	City	Jordan	Medicine	Undergraduate	4	Student	Family		No	No	Rarely	Rarely	Rarely	Rarely	Rarely	Rarely	Rarely	Rarely	Rarely	Rarely	Rarely	Rarely	Rarely	Rarely	Rarely	Sometimes	Rarely	Rarely	Rarely	Rarely	Rarely	Sometimes	Sometimes	Sometimes	Rarely	Rarely	Yes	No	No	No	No	Yes	Yes	Yes	No	No
2022/09/09 10:40:19 PM GMT+3	Yes	21	Female	City	Jordan	Medicine	Undergraduate	3	Student	Family		No	No	Sometimes	Sometimes	Frequently	Frequently	Frequently	Sometimes	Sometimes	Frequently	Frequently	Frequently	Frequently	Rarely	Sometimes	Sometimes	Frequently	Sometimes	Frequently	Rarely	Sometimes	Frequently	Frequently	Frequently	Sometimes	Sometimes	Sometimes	Rarely	Yes	Yes	No	No	Yes	Yes	Yes	No	No	No
2022/09/09 10:40:31 PM GMT+3	Yes	19	Female	City	Jordan	Medicine	Undergraduate	Second year	Student	Family	With friends	No	No	Sometimes	Sometimes	Sometimes	Sometimes	Sometimes	Sometimes	Frequently	Frequently	Rarely	Frequently	Frequently	Sometimes	Sometimes	Rarely	Rarely	Sometimes	Sometimes	Sometimes	Frequently	Frequently	Frequently	Sometimes	Sometimes	Rarely	Sometimes	Rarely	Yes	Yes	No	No	No	Yes	Yes	Yes	Yes	Yes
2022/09/09 10:40:53 PM GMT+3	Yes	22	Female	City	Jordan	Medicine	Undergraduate	5th year	Student	Family		No	No	Sometimes	Sometimes	Rarely	Sometimes	Rarely	Sometimes	Sometimes	Sometimes	Rarely	Rarely	Rarely	Rarely	Rarely	Rarely	Rarely	Rarely	Rarely	Rarely	Rarely	Sometimes	Rarely	Sometimes	Sometimes	Sometimes	Sometimes	Rarely	Yes	Yes	No	No	No	Yes	No	Yes	No	No
2022/09/09 10:41:15 PM GMT+3	Yes	21	Female	City	Jordan	Medicine	Undergraduate	2	Student	Family		Yes	Others	Frequently	Frequently	Frequently	Frequently	Sometimes	Sometimes	Rarely	Frequently	Rarely	Sometimes	Sometimes	Sometimes	Rarely	Rarely	Rarely	Sometimes	Sometimes	Sometimes	Frequently	Frequently	Frequently	Frequently	Sometimes	Rarely	Rarely	Rarely	Yes	No	No	No	Yes	Yes	No	No	No	No
2022/09/09 10:44:19 PM GMT+3	Yes	23	Female	City	Jordan	Medicine	Undergraduate	5th	Student	Family		No	No	Frequently	Sometimes	Frequently	Frequently	Frequently	Rarely	Rarely	Frequently	Sometimes	Sometimes	Rarely	Rarely	Frequently	Sometimes	Rarely	Frequently	Sometimes	Sometimes	Frequently	Frequently	Sometimes	Frequently	Frequently	Frequently	Frequently	Rarely	Yes	Yes	No	No	No	Yes	No	No	No	No
2022/09/09 10:46:39 PM GMT+3	Yes	20	Female	City	Jordan	Medicine	Undergraduate	3rd	Student	Family		No	No	Rarely	Rarely	Sometimes	Rarely	Rarely	Sometimes	Sometimes	Sometimes	Rarely	Rarely	Rarely	Rarely	Rarely	Sometimes	Rarely	Frequently	Rarely	Rarely	Frequently	Sometimes	Sometimes	Rarely	Sometimes	Sometimes	Rarely	Rarely	No	No	No	No	Yes	Yes	No	No	No	No
2022/09/09 10:47:32 PM GMT+3	Yes	21	Female	City	Jordan	Medicine	Undergraduate	2	Student	Family		No	No	Sometimes	Rarely	Sometimes	Sometimes	Rarely	Sometimes	Sometimes	Sometimes	Sometimes	Sometimes	Sometimes	Frequently	Sometimes	Sometimes	Rarely	Sometimes	Sometimes	Frequently	Rarely	Sometimes	Sometimes	Sometimes	Sometimes	Sometimes	Rarely	Rarely	Yes	No	No	No	Yes	Yes	Yes	No	Yes	No
2022/09/09 10:48:12 PM GMT+3	Yes	23	Female	City	Jordan	Medicine	Undergraduate	5	Student	Family		No	No	Sometimes	Rarely	Sometimes	Rarely	Sometimes	Frequently	Rarely	Frequently	Sometimes	Rarely	Sometimes	Sometimes	Rarely	Rarely	Sometimes	Sometimes	Rarely	Sometimes	Sometimes	Frequently	Sometimes	Rarely	Sometimes	Sometimes	Rarely	Rarely	No	No	No	No	No	Yes	No	No	No	No
2022/09/09 10:48:30 PM GMT+3	Yes	22	Female	City	Jordan	Medicine	Undergraduate	5	Student	Family		No	No	Sometimes	Rarely	Sometimes	Sometimes	Sometimes	Sometimes	Sometimes	Frequently	Sometimes	Frequently	Sometimes	Sometimes	Sometimes	Sometimes	Rarely	Sometimes	Sometimes	Sometimes	Sometimes	Sometimes	Sometimes	Sometimes	Sometimes	Rarely	Sometimes	Rarely	Yes	Yes	No	No	Yes	Yes	No	No	No	No
2022/09/09 10:50:16 PM GMT+3	Yes	20	Female	City	Jordan	Medicine	Undergraduate	3	Student	Family		No	No	Rarely	Rarely	Rarely	Rarely	Sometimes	Rarely	Sometimes	Rarely	Sometimes	Rarely	Rarely	Rarely	Rarely	Sometimes	Sometimes	Rarely	Sometimes	Sometimes	Sometimes	Frequently	Sometimes	Sometimes	Rarely	Rarely	Sometimes	Rarely	No	Yes	No	No	No	Yes	No	No	Yes	Yes
2022/09/09 10:52:44 PM GMT+3	Yes	20	Female	City	Jordan	Medicine	Undergraduate	3	Student	Family		No	No	Frequently	Frequently	Frequently	Frequently	Rarely	Sometimes	Rarely	Rarely	Sometimes	Rarely	Frequently	Sometimes	Sometimes	Sometimes	Sometimes	Rarely	Rarely	Rarely	Rarely	Frequently	Sometimes	Sometimes	Rarely	Rarely	Frequently	Rarely	No	No	No	No	No	Yes	No	No	No	No
2022/09/09 10:54:43 PM GMT+3	Yes	22	Female	City	Jordan	Medicine	Undergraduate	5	Student	Another city	With friends	No	No	Rarely	Frequently	Sometimes	Rarely	Rarely	Sometimes	Sometimes	Sometimes	Sometimes	Rarely	Rarely	Sometimes	Sometimes	Sometimes	Rarely	Rarely	Rarely	Rarely	Sometimes	Sometimes	Frequently	Sometimes	Sometimes	Sometimes	Sometimes	Rarely	Yes	No	No	No	No	No	No	Yes	No	No
2022/09/09 10:58:34 PM GMT+3	Yes	20	Female	City	Jordan	Medicine	Undergraduate	2024	Student	Family	With friends	No	No	Sometimes	Sometimes	Sometimes	Rarely	Rarely	Sometimes	Rarely	Rarely	Rarely	Sometimes	Sometimes	Sometimes	Rarely	Rarely	Sometimes	Sometimes	Sometimes	Rarely	Sometimes	Sometimes	Sometimes	Sometimes	Sometimes	Sometimes	Rarely	Sometimes	Yes	No	No	Yes	No	Yes	No	No	Yes	No
2022/09/09 10:59:15 PM GMT+3	Yes	21	Female	City	Jordan	Medicine	Undergraduate	5th	Student	Family		No	No	Rarely	Frequently	Sometimes	Rarely	Frequently	Rarely	Sometimes	Frequently	Sometimes	Sometimes	Rarely	Rarely	Sometimes	Sometimes	Rarely	Frequently	Rarely	Rarely	Frequently	Frequently	Frequently	Sometimes	Sometimes	Sometimes	Sometimes	Rarely	Yes	Yes	No	No	No	Yes	No	Yes	Yes	No
2022/09/09 11:00:23 PM GMT+3	Yes	20	Female	City	Jordan	Medicine	Undergraduate	2	Student	Family		No	No	Sometimes	Sometimes	Frequently	Frequently	Sometimes	Rarely	Rarely	Rarely	Rarely	Rarely	Rarely	Rarely	Rarely	Rarely	Rarely	Rarely	Rarely	Rarely	Rarely	Rarely	Rarely	Rarely	Rarely	Rarely	Rarely	Rarely	No	No	No	No	No	No	No	No	No	No
2022/09/09 11:02:50 PM GMT+3	Yes	20	Female	City	Jordan	Medicine	Undergraduate	4	Student	Family		No	No	Frequently	Rarely	Rarely	Rarely	Rarely	Sometimes	Rarely	Frequently	Rarely	Rarely	Rarely	Rarely	Rarely	Rarely	Rarely	Sometimes	Rarely	Rarely	Rarely	Frequently	Rarely	Rarely	Frequently	Rarely	Frequently	Sometimes	No	No	No	No	No	Yes	Yes	No	No	No
2022/09/09 11:08:23 PM GMT+3	Yes	21	Female	City	Jordan	Medicine	Undergraduate	2nd year	Student	Family		No	No	Sometimes	Rarely	Frequently	Sometimes	Rarely	Sometimes	Sometimes	Frequently	Rarely	Rarely	Sometimes	Rarely	Rarely	Rarely	Rarely	Rarely	Rarely	Sometimes	Sometimes	Sometimes	Rarely	Rarely	Sometimes	Rarely	Rarely	Rarely	No	Yes	No	No	No	Yes	No	No	No	No
2022/09/09 11:17:44 PM GMT+3	Yes	21	Female	City	Jordan	Medicine	Undergraduate	4th	Student	Family		No	No	Sometimes	Sometimes	Sometimes	Rarely	Rarely	Rarely	Rarely	Sometimes	Frequently	Sometimes	Sometimes	Rarely	Rarely	Rarely	Rarely	Sometimes	Sometimes	Sometimes	Sometimes	Rarely	Sometimes	Sometimes	Rarely	Sometimes	Rarely	Sometimes	No	No	No	Yes	No	Yes	No	Yes	Yes	Yes
2022/09/09 11:19:27 PM GMT+3	Yes	21	Female	City	Jordan	Medicine	Undergraduate	4	Student	Family		No	No	Sometimes	Sometimes	Sometimes	Sometimes	Frequently	Sometimes	Sometimes	Sometimes	Sometimes	Sometimes	Sometimes	Sometimes	Sometimes	Sometimes	Sometimes	Sometimes	Sometimes	Sometimes	Sometimes	Frequently	Sometimes	Sometimes	Sometimes	Sometimes	Sometimes	Sometimes	Yes	Yes	No	No	No	Yes	Yes	Yes	No	No
2022/09/09 11:23:21 PM GMT+3	Yes	20	Female	City	Jordan	Medicine	Undergraduate	Second	Student	Family		No	No	Sometimes	Sometimes	Sometimes	Sometimes	Sometimes	Sometimes	Sometimes	Sometimes	Sometimes	Sometimes	Sometimes	Sometimes	Sometimes	Sometimes	Rarely	Sometimes	Rarely	Rarely	Sometimes	Sometimes	Rarely	Rarely	Sometimes	Sometimes	Sometimes	Sometimes	No	No	No	No	No	No	No	No	No	No
2022/09/09 11:32:42 PM GMT+3	Yes	21	Female	City	Jordan	Medicine	Undergraduate	3	Student	Family	With friends	No	No	Sometimes	Sometimes	Sometimes	Sometimes	Sometimes	Rarely	Sometimes	Frequently	Sometimes	Sometimes	Sometimes	Sometimes	Sometimes	Sometimes	Sometimes	Sometimes	Sometimes	Rarely	Sometimes	Rarely	Sometimes	Rarely	Sometimes	Rarely	Rarely	Rarely	Yes	Yes	Yes	Yes	Yes	Yes	Yes	Yes	No	No
2022/09/09 11:33:57 PM GMT+3	Yes	21	Female	City	Jordan	Medicine	Undergraduate	3	Student	Family		No	No	Sometimes	Rarely	Sometimes	Rarely	Rarely	Rarely	Rarely	Sometimes	Rarely	Rarely	Rarely	Rarely	Rarely	Rarely	Rarely	Rarely	Frequently	Rarely	Sometimes	Sometimes	Sometimes	Rarely	Sometimes	Sometimes	Rarely	Rarely	No	Yes	No	Yes	No	Yes	Yes	No	No	No
2022/09/09 11:39:37 PM GMT+3	Yes	20	Female	City	Jordan	Medicine	Undergraduate	3	Student	Family		No	No	Frequently	Sometimes	Frequently	Frequently	Sometimes	Frequently	Frequently	Frequently	Sometimes	Frequently	Sometimes	Sometimes	Sometimes	Sometimes	Sometimes	Sometimes	Sometimes	Rarely	Frequently	Frequently	Frequently	Frequently	Sometimes	Sometimes	Sometimes	Sometimes	Yes	No	No	No	No	No	Yes	No	No	No
2022/09/09 11:42:07 PM GMT+3	Yes	21	Female	City	Jordan	Medicine	Undergraduate	5	Student	Family		No	No	Rarely	Rarely	Sometimes	Rarely	Rarely	Rarely	Sometimes	Rarely	Rarely	Rarely	Rarely	Rarely	Sometimes	Sometimes	Sometimes	Sometimes	Sometimes	Sometimes	Frequently	Frequently	Sometimes	Rarely	Rarely	Sometimes	Rarely	Rarely	Yes	Yes	No	No	No	No	No	No	No	Yes
2022/09/09 11:51:42 PM GMT+3	Yes	21	Female	City	Jordan	Medicine	Undergraduate	4	Student	Family		No	No	Sometimes	Rarely	Rarely	Rarely	Frequently	Sometimes	Rarely	Sometimes	Rarely	Sometimes	Sometimes	Rarely	Rarely	Sometimes	Rarely	Frequently	Sometimes	Sometimes	Rarely	Rarely	Sometimes	Rarely	Sometimes	Sometimes	Frequently	Rarely	No	No	No	No	No	Yes	No	No	Yes	No
2022/09/10 12:04:34 AM GMT+3	Yes	21	Female	City	Jordan	Medicine	Undergraduate	4	Student	Family		No	No	Sometimes	Rarely	Sometimes	Rarely	Rarely	Sometimes	Sometimes	Sometimes	Sometimes	Sometimes	Rarely	Sometimes	Rarely	Rarely	Sometimes	Frequently	Rarely	Rarely	Rarely	Sometimes	Rarely	Frequently	Sometimes	Sometimes	Sometimes	Rarely	No	Yes	No	No	Yes	Yes	Yes	Yes	Yes	Yes
2022/09/10 12:19:45 AM GMT+3	Yes	19	Female	City	Jordan	Medicine	Undergraduate	1	Student	Family		No	No	Frequently	Rarely	Sometimes	Sometimes	Frequently	Sometimes	Sometimes	Sometimes	Sometimes	Sometimes	Sometimes	Rarely	Rarely	Rarely	Rarely	Sometimes	Rarely	Rarely	Frequently	Sometimes	Rarely	Sometimes	Sometimes	Sometimes	Rarely	Rarely	Yes	Yes	No	No	Yes	Yes	Yes	Yes	No	Yes
2022/09/10 12:43:50 AM GMT+3	Yes	20	Female	City	Jordan	Medicine	Undergraduate	2	Student	Family		No	No	Sometimes	Rarely	Sometimes	Sometimes	Sometimes	Rarely	Sometimes	Sometimes	Rarely	Rarely	Rarely	Sometimes	Sometimes	Frequently	Rarely	Sometimes	Rarely	Rarely	Frequently	Sometimes	Sometimes	Sometimes	Rarely	Sometimes	Sometimes	Sometimes	No	Yes	No	No	No	Yes	Yes	No	Yes	Yes
2022/09/10 12:45:22 AM GMT+3	Yes	21	Female	City	Jordan	Medicine	Undergraduate	4th	Student	Family		Yes	Others	Sometimes	Rarely	Sometimes	Sometimes	Rarely	Rarely	Rarely	Sometimes	Rarely	Rarely	Rarely	Rarely	Rarely	Rarely	Rarely	Sometimes	Sometimes	Rarely	Rarely	Rarely	Rarely	Sometimes	Sometimes	Sometimes	Rarely	Rarely	No	No	No	No	No	Yes	No	Yes	No	No
2022/09/10 12:54:04 AM GMT+3	Yes	19	Female	City	Jordan	Medicine	Undergraduate	2nd year	Student	Family		No	No	Sometimes	Rarely	Rarely	Sometimes	Sometimes	Sometimes	Rarely	Sometimes	Rarely	Rarely	Rarely	Rarely	Rarely	Rarely	Rarely	Rarely	Sometimes	Sometimes	Sometimes	Sometimes	Rarely	Rarely	Sometimes	Rarely	Rarely	Rarely	Yes	No	No	No	No	Yes	Yes	Yes	No	No
2022/09/10 2:03:17 AM GMT+3	Yes	20	Female	Countryside	Jordan	Medicine	Undergraduate	3	Student	Family		No	No	Frequently	Rarely	Sometimes	Sometimes	Rarely	Frequently	Sometimes	Sometimes	Rarely	Rarely	Rarely	Rarely	Rarely	Sometimes	Sometimes	Frequently	Rarely	Rarely	Sometimes	Sometimes	Sometimes	Sometimes	Frequently	Sometimes	Sometimes	Sometimes	No	No	No	No	No	Yes	No	No	No	No
2022/09/10 5:34:12 AM GMT+3	Yes	21	Female	City	Jordan	Medicine	Undergraduate	4	Student	Family		No	No	Rarely	Rarely	Rarely	Sometimes	Sometimes	Sometimes	Sometimes	Rarely	Rarely	Rarely	Rarely	Sometimes	Rarely	Rarely	Rarely	Rarely	Rarely	Rarely	Frequently	Sometimes	Rarely	Sometimes	Sometimes	Rarely	Rarely	Rarely	Yes	Yes	No	No	No	Yes	No	No	No	No
2022/09/10 6:23:39 AM GMT+3	Yes	21	Female	City	Jordan	Medicine	Undergraduate	2	Student	Family	Alone	No	No	Sometimes	Sometimes	Sometimes	Rarely	Sometimes	Rarely	Sometimes	Sometimes	Sometimes	Rarely	Rarely	Rarely	Rarely	Rarely	Sometimes	Rarely	Rarely	Rarely	Rarely	Rarely	Sometimes	Sometimes	Sometimes	Rarely	Rarely	Rarely	Yes	No	Yes	No	Yes	Yes	No	Yes	No	Yes
2022/09/10 7:46:23 AM GMT+3	Yes	19	Female	City	Jordan	Medicine	Undergraduate	2	Student	Family		No	No	Frequently	Sometimes	Sometimes	Sometimes	Sometimes	Sometimes	Sometimes	Sometimes	Sometimes	Sometimes	Sometimes	Sometimes	Sometimes	Sometimes	Sometimes	Sometimes	Sometimes	Sometimes	Sometimes	Sometimes	Sometimes	Sometimes	Sometimes	Sometimes	Sometimes	Sometimes	Yes	Yes	No	No	Yes	Yes	Yes	No	Yes	No
2022/09/10 10:43:53 AM GMT+3	Yes	20	Female	City	Jordan	Medicine	Undergraduate	2	Student	Family		No	No	Sometimes	Rarely	Frequently	Sometimes	Rarely	Sometimes	Rarely	Frequently	Rarely	Frequently	Sometimes	Frequently	Sometimes	Sometimes	Sometimes	Frequently	Frequently	Frequently	Frequently	Frequently	Frequently	Sometimes	Frequently	Frequently	Sometimes	Rarely	Yes	No	No	No	No	No	Yes	Yes	Yes	No
2022/09/10 5:02:02 PM GMT+3	Yes	20	Female	Countryside	Jordan	Medicine	Undergraduate	3	Student	Family		No	No	Sometimes	Rarely	Frequently	Sometimes	Rarely	Sometimes	Sometimes	Sometimes	Sometimes	Frequently	Sometimes	Sometimes	Sometimes	Sometimes	Rarely	Frequently	Sometimes	Sometimes	Rarely	Frequently	Sometimes	Sometimes	Sometimes	Sometimes	Sometimes	Rarely	No	No	No	No	No	No	Yes	No	No	No
2022/09/10 5:33:16 PM GMT+3	Yes	20	Female	City	Jordan	Medicine	Undergraduate	4	Student	Family		No	No	Sometimes	Sometimes	Frequently	Frequently	Sometimes	Sometimes	Frequently	Sometimes	Rarely	Sometimes	Sometimes	Sometimes	Rarely	Sometimes	Sometimes	Frequently	Sometimes	Rarely	Frequently	Sometimes	Sometimes	Sometimes	Rarely	Rarely	Sometimes	Sometimes	No	Yes	No	No	No	Yes	No	Yes	Yes	Yes
2022/09/10 6:01:13 PM GMT+3	Yes	21	Female	City	Jordan	Medicine	Undergraduate	Second year	Student	Family	Alone	No	No	Sometimes	Rarely	Rarely	Sometimes	Rarely	Rarely	Sometimes	Frequently	Frequently	Frequently	Rarely	Rarely	Rarely	Rarely	Sometimes	Rarely	Sometimes	Sometimes	Frequently	Frequently	Sometimes	Sometimes	Frequently	Rarely	Rarely	Rarely	Yes	No	No	No	No	Yes	Yes	No	No	No
2022/09/11 4:25:45 PM GMT+3	Yes	21	Female	City	Jordan	Medicine	Undergraduate	Third year	Student	Family		No	No	Rarely	Rarely	Sometimes	Rarely	Sometimes	Sometimes	Sometimes	Rarely	Sometimes	Rarely	Sometimes	Sometimes	Rarely	Rarely	Rarely	Sometimes	Rarely	Sometimes	Frequently	Sometimes	Rarely	Sometimes	Sometimes	Rarely	Rarely	Rarely	Yes	Yes	No	No	No	Yes	No	No	No	No
2022/09/11 4:29:22 PM GMT+3	Yes	20	Female	City	Jordan	Medicine	Undergraduate	3	Student	Family		No	No	Sometimes	Sometimes	Sometimes	Sometimes	Sometimes	Frequently	Frequently	Frequently	Rarely	Sometimes	Rarely	Rarely	Sometimes	Rarely	Sometimes	Sometimes	Sometimes	Frequently	Sometimes	Rarely	Sometimes	Sometimes	Sometimes	Rarely	Frequently	Rarely	Yes	No	No	No	Yes	No	Yes	Yes	No	Yes
2022/09/11 5:00:39 PM GMT+3	Yes	18	Female	City	Jordan	Medicine	Undergraduate	first year	Student	Family		No	No	Rarely	Rarely	Frequently	Rarely	Rarely	Rarely	Rarely	Rarely	Rarely	Rarely	Rarely	Rarely	Rarely	Rarely	Rarely	Rarely	Rarely	Rarely	Frequently	Rarely	Rarely	Rarely	Rarely	Rarely	Rarely	Rarely	No	No	No	No	No	No	No	No	No	No
2022/09/11 5:21:21 PM GMT+3	Yes	20	Male	City	Jordan	Medicine	Undergraduate	3	Student	Family		No	No	Sometimes	Rarely	Frequently	Frequently	Sometimes	Frequently	Sometimes	Sometimes	Rarely	Rarely	Frequently	Rarely	Rarely	Rarely	Sometimes	Frequently	Sometimes	Sometimes	Rarely	Sometimes	Sometimes	Frequently	Sometimes	Rarely	Rarely	Rarely	Yes	Yes	No	No	No	Yes	Yes	No	No	No
2022/09/11 6:32:10 PM GMT+3	Yes	20	Female	City	Jordan	Medicine	Undergraduate	2nd year	Student	Family		No	No	Rarely	Rarely	Sometimes	Sometimes	Rarely	Rarely	Sometimes	Rarely	Rarely	Frequently	Rarely	Rarely	Sometimes	Sometimes	Rarely	Sometimes	Rarely	Rarely	Rarely	Sometimes	Sometimes	Rarely	Sometimes	Rarely	Rarely	Sometimes	No	Yes	No	No	No	Yes	No	No	No	No
2022/09/11 7:36:32 PM GMT+3	Yes	19	Female	City	Jordan	Medicine	Undergraduate	2nd	Student	Another city	Alone	No	No	Sometimes	Rarely	Sometimes	Sometimes	Rarely	Sometimes	Rarely	Sometimes	Rarely	Rarely	Rarely	Rarely	Rarely	Rarely	Rarely	Rarely	Sometimes	Rarely	Sometimes	Sometimes	Sometimes	Sometimes	Sometimes	Rarely	Rarely	Rarely	Yes	No	No	No	No	Yes	No	No	No	No
2022/09/11 8:31:13 PM GMT+3	Yes	19	Female	City	Jordan	Medicine	Undergraduate	1	Student	Family		No	No	Sometimes	Rarely	Frequently	Sometimes	Frequently	Sometimes	Frequently	Frequently	Frequently	Sometimes	Frequently	Sometimes	Rarely	Sometimes	Rarely	Frequently	Rarely	Sometimes	Frequently	Frequently	Sometimes	Sometimes	Sometimes	Rarely	Sometimes	Sometimes	Yes	No	No	No	No	Yes	Yes	No	Yes	Yes
2022/09/11 8:55:55 PM GMT+3	Yes	21	Female	City	Jordan	Medicine	Undergraduate	second year	Student	Family		No	No	Sometimes	Frequently	Sometimes	Rarely	Rarely	Sometimes	Sometimes	Frequently	Rarely	Frequently	Sometimes	Rarely	Sometimes	Rarely	Rarely	Frequently	Rarely	Rarely	Rarely	Sometimes	Sometimes	Sometimes	Sometimes	Sometimes	Rarely	Rarely	No	No	No	No	Yes	Yes	Yes	Yes	Yes	Yes
2022/09/11 9:40:49 PM GMT+3	Yes	19	Female	City	Jordan	Medicine	Postgraduate		Student	Family		No	No	Sometimes	Sometimes	Sometimes	Sometimes	Sometimes	Sometimes	Sometimes	Sometimes	Sometimes	Sometimes	Sometimes	Sometimes	Sometimes	Sometimes	Sometimes	Sometimes	Sometimes	Sometimes	Sometimes	Sometimes	Sometimes	Sometimes	Sometimes	Sometimes	Sometimes	Sometimes	Yes	Yes	Yes	Yes	Yes	Yes	Yes	Yes	No	Yes
2022/09/11 9:42:30 PM GMT+3	Yes	22	Female	City	Jordan	Medicine	Undergraduate	4	Student	Family		Yes	Others	Frequently	Rarely	Sometimes	Frequently	Sometimes	Frequently	Frequently	Sometimes	Sometimes	Sometimes	Sometimes	Rarely	Sometimes	Rarely	Sometimes	Sometimes	Sometimes	Frequently	Frequently	Frequently	Sometimes	Sometimes	Sometimes	Sometimes	Rarely	Sometimes	Yes	No	No	Yes	Yes	No	No	No	Yes	No
2022/09/11 9:50:53 PM GMT+3	Yes	18.5	Female	City	Jordan	Medicine	Undergraduate	Will start second year soon	Student	Family		Yes	Others	Sometimes	Rarely	Sometimes	Rarely	Rarely	Sometimes	Rarely	Frequently	Rarely	Rarely	Sometimes	Rarely	Rarely	Rarely	Rarely	Sometimes	Sometimes	Rarely	Frequently	Frequently	Sometimes	Frequently	Sometimes	Rarely	Rarely	Rarely	Yes	Yes	No	No	No	Yes	Yes	No	No	No
2022/09/11 9:51:15 PM GMT+3	Yes	19	Female	City	USA	Medicine	Undergraduate	Second year	Student	Another city	With friends	No	No	Rarely	Rarely	Rarely	Rarely	Sometimes	Rarely	Rarely	Sometimes	Rarely	Sometimes	Rarely	Rarely	Sometimes	Rarely	Rarely	Sometimes	Sometimes	Sometimes	Frequently	Frequently	Sometimes	Sometimes	Sometimes	Sometimes	Rarely	Rarely	No	No	Yes	Yes	Yes	Yes	No	No	No	No
2022/09/11 9:51:57 PM GMT+3	Yes	21	Female	City	Jordan	Medicine	Undergraduate	4	Student	Family		No	No	Sometimes	Rarely	Sometimes	Rarely	Rarely	Sometimes	Frequently	Frequently	Sometimes	Sometimes	Sometimes	Rarely	Rarely	Rarely	Rarely	Sometimes	Rarely	Rarely	Rarely	Sometimes	Rarely	Sometimes	Frequently	Sometimes	Rarely	Sometimes	No	Yes	No	No	No	Yes	No	Yes	Yes	Yes
2022/09/11 9:53:56 PM GMT+3	Yes	19.5	Male	City	Jordan	Medicine	Undergraduate	2nd year	Surgery	Another city	Alone	No	No	Sometimes	Rarely	Sometimes	Sometimes	Rarely	Sometimes	Sometimes	Sometimes	Rarely	Sometimes	Rarely	Rarely	Rarely	Rarely	Rarely	Rarely	Rarely	Rarely	Rarely	Rarely	Rarely	Rarely	Rarely	Rarely	Rarely	Rarely	No	Yes	No	No	No	No	No	No	No	No
2022/09/11 9:54:16 PM GMT+3	Yes	20	Female	Countryside	Jordan	Medicine	Undergraduate	2nd year	Student	Family		No	No	Frequently	Sometimes	Sometimes	Sometimes	Sometimes	Sometimes	Frequently	Sometimes	Frequently	Sometimes	Sometimes	Rarely	Sometimes	Sometimes	Sometimes	Frequently	Sometimes	Rarely	Frequently	Frequently	Frequently	Sometimes	Sometimes	Sometimes	Sometimes	Frequently	No	Yes	No	No	Yes	Yes	Yes	No	No	No
2022/09/11 9:57:08 PM GMT+3	Yes	20	Male	City	Jordan	Medicine	Undergraduate	2	Pharmacy	Family	Alone	No	No	Rarely	Rarely	Rarely	Rarely	Rarely	Rarely	Sometimes	Rarely	Rarely	Sometimes	Sometimes	Rarely	Rarely	Rarely	Rarely	Rarely	Rarely	Sometimes	Rarely	Sometimes	Sometimes	Sometimes	Rarely	Rarely	Sometimes	Sometimes	Yes	Yes	No	Yes	Yes	Yes	Yes	Yes	Yes	Yes
2022/09/11 10:00:12 PM GMT+3	Yes	19	Female	City	Jordan	Medicine	Undergraduate	2	Student	Family		No	No	Sometimes	Rarely	Sometimes	Frequently	Rarely	Rarely	Rarely	Sometimes	Rarely	Rarely	Sometimes	Sometimes	Rarely	Sometimes	Sometimes	Sometimes	Frequently	Sometimes	Frequently	Frequently	Frequently	Sometimes	Rarely	Sometimes	Rarely	Rarely	Yes	Yes	No	No	No	Yes	No	No	Yes	No
2022/09/11 10:01:28 PM GMT+3	Yes	21	Male	Countryside	Jordan	Medicine	Undergraduate	Third year	Student	Another city	Alone	No	No	Frequently	Rarely	Sometimes	Rarely	Sometimes	Sometimes	Sometimes	Sometimes	Sometimes	Sometimes	Sometimes	Rarely	Rarely	Sometimes	Rarely	Rarely	Sometimes	Rarely	Sometimes	Frequently	Rarely	Frequently	Sometimes	Rarely	Rarely	Rarely	Yes	No	No	No	Yes	Yes	No	No	No	No
2022/09/11 10:05:09 PM GMT+3	Yes	2	Male	City	Jordan	Medicine	Undergraduate	4th	Student	Family		No	No	Sometimes	Sometimes	Frequently	Sometimes	Sometimes	Rarely	Rarely	Frequently	Rarely	Sometimes	Sometimes	Rarely	Sometimes	Rarely	Rarely	Frequently	Rarely	Rarely	Rarely	Sometimes	Frequently	Sometimes	Sometimes	Rarely	Frequently	Rarely	No	Yes	No	No	Yes	Yes	Yes	Yes	No	No
2022/09/11 10:08:00 PM GMT+3	Yes	24	Female	City	Jordan	Medicine	Undergraduate	3	Student	Another city	Alone	Yes	Others	Rarely	Rarely	Sometimes	Rarely	Rarely	Sometimes	Rarely	Sometimes	Sometimes	Sometimes	Sometimes	Sometimes	Sometimes	Rarely	Rarely	Rarely	Rarely	Rarely	Rarely	Rarely	Rarely	Rarely	Rarely	Rarely	Sometimes	Rarely	No	Yes	No	No	No	Yes	Yes	No	No	No
2022/09/11 10:08:03 PM GMT+3	Yes	19	Female	City	Jordan	Medicine	Undergraduate	First year	Student	Family		No	No	Frequently	Rarely	Sometimes	Frequently	Sometimes	Sometimes	Sometimes	Frequently	Sometimes	Sometimes	Sometimes	Sometimes	Sometimes	Sometimes	Frequently	Sometimes	Frequently	Sometimes	Sometimes	Frequently	Sometimes	Frequently	Sometimes	Rarely	Sometimes	Frequently	Yes	Yes	No	No	No	Yes	No	No	No	Yes
2022/09/11 10:12:40 PM GMT+3	Yes	18	Female	City	Jordan	Medicine	Undergraduate	First	Student	Family		No	No	Sometimes	Sometimes	Rarely	Sometimes	Frequently	Rarely	Sometimes	Frequently	Frequently	Frequently	Sometimes	Rarely	Rarely	Sometimes	Rarely	Frequently	Rarely	Rarely	Rarely	Rarely	Sometimes	Sometimes	Frequently	Frequently	Sometimes	Rarely	No	No	No	No	No	Yes	Yes	No	Yes	Yes
2022/09/11 10:13:03 PM GMT+3	Yes	19	Female	City	Jordan	Medicine	Undergraduate	2nd	Student	Family		No	No	Sometimes	Rarely	Rarely	Rarely	Rarely	Rarely	Rarely	Rarely	Rarely	Rarely	Rarely	Rarely	Rarely	Rarely	Rarely	Rarely	Rarely	Rarely	Sometimes	Sometimes	Rarely	Rarely	Rarely	Rarely	Rarely	Sometimes	No	No	No	No	No	Yes	No	Yes	No	No
2022/09/11 10:16:51 PM GMT+3	Yes	20	Female	City	Jordan	Medicine	Undergraduate	2	Student	Family		No	No	Sometimes	Sometimes	Rarely	Rarely	Rarely	Rarely	Rarely	Rarely	Rarely	Rarely	Rarely	Rarely	Rarely	Rarely	Rarely	Rarely	Rarely	Rarely	Rarely	Rarely	Rarely	Rarely	Rarely	Rarely	Rarely	Rarely	No	No	No	No	No	No	No	No	No	No
2022/09/11 10:22:26 PM GMT+3	Yes	20	Female	City	Jordan	Medicine	Undergraduate	3	Student	Family		No	No	Rarely	Rarely	Sometimes	Rarely	Sometimes	Rarely	Sometimes	Sometimes	Sometimes	Rarely	Rarely	Rarely	Rarely	Rarely	Rarely	Rarely	Sometimes	Rarely	Sometimes	Sometimes	Rarely	Rarely	Sometimes	Rarely	Rarely	Rarely	No	No	No	No	No	Yes	Yes	No	No	No
2022/09/11 10:31:40 PM GMT+3	Yes	20	Female	City	Jordan	Medicine	Undergraduate	3	Student	Family	Alone	No	No	Rarely	Rarely	Rarely	Rarely	Rarely	Rarely	Rarely	Sometimes	Sometimes	Rarely	Rarely	Rarely	Rarely	Rarely	Rarely	Rarely	Rarely	Rarely	Rarely	Sometimes	Rarely	Rarely	Sometimes	Rarely	Rarely	Rarely	Yes	No	No	No	No	No	No	Yes	No	No
2022/09/11 10:35:14 PM GMT+3	Yes	21	Female	City	Jordan	Medicine	Undergraduate	2	Student	Family	With friends	Yes	Others	Frequently	Rarely	Sometimes	Sometimes	Rarely	Rarely	Rarely	Sometimes	Rarely	Rarely	Rarely	Rarely	Rarely	Rarely	Rarely	Rarely	Sometimes	Sometimes	Rarely	Frequently	Rarely	Sometimes	Sometimes	Rarely	Rarely	Sometimes	Yes	Yes	Yes	Yes	No	Yes	Yes	Yes	No	Yes
2022/09/11 10:48:43 PM GMT+3	Yes	20	Female	Countryside	Jordan	Medicine	Undergraduate	2	Student	Family	With friends	No	No	Sometimes	Sometimes	Sometimes	Sometimes	Sometimes	Sometimes	Sometimes	Sometimes	Sometimes	Sometimes	Sometimes	Sometimes	Sometimes	Sometimes	Sometimes	Sometimes	Sometimes	Sometimes	Sometimes	Sometimes	Sometimes	Sometimes	Sometimes	Sometimes	Sometimes	Sometimes	No	No	No	No	No	No	No	No	No	No
2022/09/11 11:00:09 PM GMT+3	Yes	21	Male	City	Jordan	Medicine	Undergraduate	3	Student	Family		No	No	Frequently	Sometimes	Sometimes	Sometimes	Sometimes	Rarely	Sometimes	Sometimes	Sometimes	Rarely	Sometimes	Sometimes	Rarely	Rarely	Rarely	Sometimes	Sometimes	Sometimes	Rarely	Sometimes	Rarely	Sometimes	Frequently	Sometimes	Sometimes	Rarely	Yes	Yes	No	No	No	Yes	No	Yes	Yes	Yes
2022/09/11 11:05:32 PM GMT+3	Yes	21	Female	City	Tunisia	Medicine	Undergraduate	9	Physiology	Another city	Alone	No	Hypertension	Rarely	Frequently	Frequently	Frequently	Sometimes	Frequently	Frequently	Frequently	Rarely	Rarely	Sometimes	Rarely	Frequently	Sometimes	Rarely	Frequently	Rarely	Frequently	Frequently	Sometimes	Rarely	Sometimes	Frequently	Sometimes	Sometimes	Sometimes	Yes	No	Yes	Yes	Yes	No	No	No	Yes	No
2022/09/11 11:05:54 PM GMT+3	Yes	22	Male	Countryside	Jordan	Medicine	Undergraduate	5	Student	Family		No	No	Sometimes	Rarely	Frequently	Frequently	Rarely	Rarely	Sometimes	Frequently	Sometimes	Frequently	Sometimes	Rarely	Rarely	Rarely	Sometimes	Rarely	Frequently	Frequently	Rarely	Sometimes	Sometimes	Frequently	Frequently	Sometimes	Sometimes	Frequently	Yes	Yes	No	No	Yes	Yes	No	Yes	No	No
2022/09/11 11:07:11 PM GMT+3	Yes	18	Female	Countryside	Jordan	Medicine	Undergraduate	2	Student	Family	With friends	No	No	Rarely	Sometimes	Sometimes	Frequently	Sometimes	Sometimes	Sometimes	Frequently	Frequently	Rarely	Sometimes	Rarely	Rarely	Rarely	Sometimes	Rarely	Frequently	Sometimes	Rarely	Frequently	Frequently	Frequently	Sometimes	Rarely	Rarely	Sometimes	No	No	No	No	No	Yes	No	Yes	Yes	No
2022/09/11 11:08:48 PM GMT+3	Yes	21	Female	City	Jordan	Medicine	Undergraduate	3rd year	Student	Family		No	No	Rarely	Rarely	Rarely	Rarely	Rarely	Frequently	Sometimes	Frequently	Sometimes	Sometimes	Rarely	Sometimes	Rarely	Rarely	Rarely	Rarely	Rarely	Rarely	Rarely	Frequently	Rarely	Rarely	Rarely	Rarely	Rarely	Rarely	No	No	No	No	No	No	No	Yes	No	No
2022/09/11 11:21:22 PM GMT+3	Yes	21	Female	City	Jordan	Medicine	Undergraduate	4	Student	Family		No	No	Rarely	Rarely	Sometimes	Rarely	Rarely	Sometimes	Sometimes	Sometimes	Sometimes	Sometimes	Rarely	Sometimes	Sometimes	Rarely	Rarely	Rarely	Rarely	Sometimes	Sometimes	Sometimes	Sometimes	Rarely	Sometimes	Sometimes	Sometimes	Sometimes	No	Yes	No	No	No	Yes	No	Yes	No	No
2022/09/11 11:21:38 PM GMT+3	Yes	19	Female	City	Jordan	Medicine	Undergraduate	1st	Student	Family		No	No	Sometimes	Frequently	Frequently	Sometimes	Sometimes	Sometimes	Sometimes	Frequently	Sometimes	Sometimes	Sometimes	Frequently	Sometimes	Sometimes	Sometimes	Frequently	Sometimes	Sometimes	Frequently	Sometimes	Sometimes	Frequently	Sometimes	Sometimes	Sometimes	Frequently	Yes	No	No	No	Yes	Yes	Yes	No	Yes	Yes
2022/09/11 11:22:00 PM GMT+3	Yes	19	Female	City	Jordan	Medicine	Undergraduate			Family		No	No	Sometimes	Rarely	Rarely	Sometimes	Rarely	Sometimes	Rarely	Sometimes	Sometimes	Sometimes	Rarely	Rarely	Rarely	Rarely	Rarely	Sometimes	Rarely	Rarely	Frequently	Sometimes	Sometimes	Rarely	Rarely	Rarely	Rarely	Rarely	Yes	No	No	No	No	Yes	No	Yes	No	No
2022/09/11 11:24:58 PM GMT+3	Yes	19	Female	Countryside	Jordan	Medicine	Undergraduate	Third	Student	Family		No	No	Sometimes	Rarely	Sometimes	Rarely	Rarely	Sometimes	Rarely	Rarely	Rarely	Rarely	Rarely	Sometimes	Rarely	Rarely	Rarely	Rarely	Sometimes	Rarely	Frequently	Sometimes	Rarely	Rarely	Rarely	Rarely	Frequently	Rarely	No	No	No	No	No	No	No	Yes	No	No
2022/09/11 11:25:46 PM GMT+3	Yes	22	Male	City	Jordan	Medicine	Undergraduate	4th	Student	Family		No	No	Sometimes	Rarely	Rarely	Rarely	Rarely	Frequently	Sometimes	Sometimes	Sometimes	Sometimes	Sometimes	Sometimes	Sometimes	Sometimes	Sometimes	Sometimes	Sometimes	Sometimes	Sometimes	Sometimes	Sometimes	Sometimes	Sometimes	Sometimes	Sometimes	Sometimes	Yes	Yes	Yes	No	Yes	Yes	No	No	Yes	Yes
2022/09/11 11:41:52 PM GMT+3	Yes	20	Female	City	Jordan	Medicine	Undergraduate	2	Student	Family		No	No	Frequently	Sometimes	Sometimes	Sometimes	Sometimes	Rarely	Rarely	Sometimes	Sometimes	Rarely	Frequently	Sometimes	Rarely	Rarely	Sometimes	Rarely	Sometimes	Rarely	Sometimes	Frequently	Sometimes	Frequently	Frequently	Sometimes	Sometimes	Sometimes	Yes	Yes	No	No	No	Yes	No	Yes	Yes	Yes
2022/09/11 11:42:46 PM GMT+3	Yes	21	Female	Countryside	Jordan	Medicine	Undergraduate	4th	Student	Family		No	No	Sometimes	Rarely	Frequently	Rarely	Frequently	Frequently	Frequently	Frequently	Sometimes	Sometimes	Sometimes	Rarely	Sometimes	Frequently	Frequently	Frequently	Rarely	Sometimes	Rarely	Rarely	Rarely	Sometimes	Sometimes	Frequently	Sometimes	Rarely	Yes	No	No	No	No	Yes	Yes	Yes	Yes	No
2022/09/11 11:45:56 PM GMT+3	No	20	Male	City	Jordan	Medicine	Undergraduate	3rd	Student	Family	With friends	No	No	Sometimes	Sometimes	Sometimes	Sometimes	Sometimes	Sometimes	Sometimes	Sometimes	Sometimes	Sometimes	Sometimes	Sometimes	Sometimes	Sometimes	Sometimes	Sometimes	Sometimes	Sometimes	Sometimes	Sometimes	Sometimes	Sometimes	Sometimes	Sometimes	Sometimes	Sometimes	No	No	Yes	No	Yes	Yes	No	No	No	No
2022/09/11 11:58:57 PM GMT+3	Yes	21	Female	City	Jordan	Medicine	Undergraduate	4	Student	Family		No	No	Sometimes	Rarely	Rarely	Rarely	Rarely	Sometimes	Sometimes	Sometimes	Sometimes	Rarely	Sometimes	Sometimes	Rarely	Rarely	Rarely	Sometimes	Sometimes	Sometimes	Sometimes	Sometimes	Sometimes	Sometimes	Sometimes	Rarely	Sometimes	Sometimes	Yes	No	No	No	No	Yes	No	No	No	No
2022/09/12 12:10:12 AM GMT+3	Yes	20	Male	City	Jordan	Medicine	Undergraduate	2	Student	Family		Yes	Others	Sometimes	Rarely	Sometimes	Sometimes	Sometimes	Rarely	Frequently	Frequently	Sometimes	Sometimes	Frequently	Rarely	Sometimes	Rarely	Rarely	Sometimes	Sometimes	Rarely	Sometimes	Frequently	Rarely	Frequently	Rarely	Rarely	Sometimes	Sometimes	Yes	Yes	No	Yes	Yes	No	Yes	No	No	Yes
2022/09/12 12:20:34 AM GMT+3	Yes	19	Female	Countryside	Jordan	Medicine	Undergraduate	1	Student	Family	Alone	No	No	Sometimes	Sometimes	Sometimes	Frequently	Sometimes	Rarely	Sometimes	Sometimes	Rarely	Rarely	Sometimes	Rarely	Sometimes	Rarely	Rarely	Sometimes	Sometimes	Rarely	Rarely	Frequently	Sometimes	Sometimes	Frequently	Rarely	Rarely	Rarely	Yes	No	No	No	No	Yes	No	Yes	No	Yes
2022/09/12 12:39:09 AM GMT+3	Yes	19	Female	City	Jordan	Medicine	Undergraduate	2nd year	Student	Family		No	No	Rarely	Frequently	Sometimes	Sometimes	Frequently	Sometimes	Rarely	Frequently	Frequently	Frequently	Frequently	Sometimes	Frequently	Rarely	Sometimes	Frequently	Frequently	Frequently	Frequently	Frequently	Sometimes	Sometimes	Sometimes	Frequently	Rarely	Sometimes	Yes	No	No	No	Yes	Yes	Yes	No	No	Yes
2022/09/12 2:39:53 AM GMT+3	Yes	19	Male	City	Jordan	Medicine	Undergraduate	First year	Surgery	Family	With friends	No	No	Sometimes	Sometimes	Rarely	Rarely	Frequently	Sometimes	Sometimes	Frequently	Frequently	Sometimes	Sometimes	Rarely	Rarely	Sometimes	Rarely	Sometimes	Rarely	Sometimes	Rarely	Sometimes	Sometimes	Sometimes	Sometimes	Sometimes	Sometimes	Rarely	No	No	No	No	Yes	Yes	Yes	Yes	Yes	No
2022/09/12 4:26:47 AM GMT+3	Yes	18	Female	City	Jordan	Medicine	Undergraduate	First	Student	Family		No	No	Sometimes	Rarely	Rarely	Rarely	Rarely	Sometimes	Rarely	Rarely	Sometimes	Rarely	Rarely	Rarely	Rarely	Rarely	Rarely	Rarely	Rarely	Rarely	Rarely	Rarely	Rarely	Rarely	Rarely	Rarely	Rarely	Rarely	No	Yes	No	No	No	Yes	Yes	Yes	No	No
2022/09/12 8:16:13 AM GMT+3	Yes	20	Male	Countryside	Jordan	Medicine	Undergraduate	1st year	Student	Family		No	No	Rarely	Frequently	Sometimes	Rarely	Frequently	Frequently	Rarely	Frequently	Sometimes	Sometimes	Frequently	Rarely	Rarely	Frequently	Sometimes	Sometimes	Sometimes	Frequently	Sometimes	Frequently	Rarely	Frequently	Frequently	Frequently	Rarely	Rarely	No	Yes	No	No	No	Yes	Yes	No	Yes	Yes
2022/09/12 9:50:06 AM GMT+3	Yes	19	Female	City	Jordan	Medicine	Undergraduate	Second year	Student	Family		No	No	Sometimes	Rarely	Frequently	Frequently	Sometimes	Sometimes	Rarely	Sometimes	Sometimes	Frequently	Sometimes	Sometimes	Rarely	Rarely	Sometimes	Sometimes	Sometimes	Rarely	Frequently	Frequently	Frequently	Frequently	Sometimes	Rarely	Sometimes	Rarely	No	No	No	No	No	Yes	Yes	No	No	No
2022/09/12 10:19:20 AM GMT+3	Yes	20	Female	City	Jordan	Medicine	Undergraduate	2	Student	Family		No	No	Rarely	Rarely	Rarely	Rarely	Sometimes	Rarely	Sometimes	Sometimes	Rarely	Sometimes	Sometimes	Rarely	Sometimes	Sometimes	Rarely	Sometimes	Rarely	Rarely	Sometimes	Rarely	Rarely	Sometimes	Rarely	Sometimes	Sometimes	Rarely	No	No	No	No	No	Yes	No	No	No	No
2022/09/12 10:19:45 AM GMT+3	Yes	21	Female	City	Jordan	Medicine	Undergraduate	4	Student	Family		No	No	Sometimes	Rarely	Rarely	Rarely	Rarely	Rarely	Rarely	Rarely	Rarely	Rarely	Rarely	Sometimes	Sometimes	Rarely	Rarely	Rarely	Sometimes	Rarely	Sometimes	Sometimes	Rarely	Rarely	Rarely	Sometimes	Sometimes	Sometimes	No	No	No	Yes	Yes	Yes	No	Yes	No	No
2022/09/12 10:45:34 AM GMT+3	Yes	20	Male	City	Jordan	Medicine	Undergraduate	Second year	Student	Family		No	No	Sometimes	Sometimes	Sometimes	Rarely	Frequently	Rarely	Sometimes	Sometimes	Sometimes	Sometimes	Rarely	Rarely	Rarely	Rarely	Sometimes	Rarely	Rarely	Rarely	Frequently	Sometimes	Frequently	Rarely	Sometimes	Sometimes	Sometimes	Sometimes	No	No	Yes	Yes	No	No	Yes	No	Yes	No
2022/09/12 11:35:42 AM GMT+3	Yes	21	Male	City	Jordan	Medicine	Undergraduate	4	Student	Family		Yes	Others	Sometimes	Sometimes	Rarely	Sometimes	Sometimes	Rarely	Rarely	Sometimes	Rarely	Sometimes	Sometimes	Rarely	Rarely	Sometimes	Sometimes	Sometimes	Rarely	Frequently	Rarely	Sometimes	Sometimes	Sometimes	Sometimes	Sometimes	Sometimes	Frequently	Yes	Yes	Yes	No	Yes	Yes	Yes	Yes	No	Yes
2022/09/12 12:02:12 PM GMT+3	Yes	20	Male	City	Jordan	Medicine	Undergraduate	3rd year	Student	Family		No	No	Rarely	Rarely	Frequently	Sometimes	Rarely	Rarely	Sometimes	Sometimes	Rarely	Rarely	Rarely	Rarely	Sometimes	Sometimes	Rarely	Sometimes	Sometimes	Rarely	Rarely	Sometimes	Rarely	Rarely	Rarely	Frequently	Rarely	Rarely	Yes	No	No	No	No	Yes	Yes	No	Yes	No
2022/09/12 1:04:17 PM GMT+3	Yes	23	Female	City	Jordan	Medicine	Undergraduate	4	Student	Family		No	No	Sometimes	Sometimes	Sometimes	Rarely	Frequently	Rarely	Sometimes	Rarely	Sometimes	Sometimes	Sometimes	Rarely	Frequently	Sometimes	Sometimes	Rarely	Sometimes	Sometimes	Rarely	Sometimes	Frequently	Sometimes	Sometimes	Sometimes	Sometimes	Rarely	Yes	No	Yes	Yes	No	No	Yes	Yes	No	Yes
2022/09/12 2:39:45 PM GMT+3	Yes	19	Female	City	Jordan	Medicine	Undergraduate	1st year	Student	Family		No	No	Sometimes	Sometimes	Frequently	Sometimes	Sometimes	Sometimes	Sometimes	Sometimes	Frequently	Frequently	Frequently	Sometimes	Sometimes	Frequently	Rarely	Frequently	Sometimes	Rarely	Frequently	Frequently	Frequently	Sometimes	Sometimes	Rarely	Rarely	Rarely	No	No	No	No	No	Yes	No	No	No	No
2022/09/12 2:40:17 PM GMT+3	Yes	21	Female	City	Jordan	Medicine	Undergraduate	3	Student	Family	Alone	No	No	Frequently	Rarely	Rarely	Rarely	Rarely	Sometimes	Sometimes	Frequently	Frequently	Sometimes	Sometimes	Sometimes	Rarely	Rarely	Rarely	Sometimes	Sometimes	Rarely	Rarely	Sometimes	Sometimes	Sometimes	Sometimes	Sometimes	Sometimes	Sometimes	No	No	No	No	Yes	Yes	Yes	Yes	No	No
2022/09/12 3:09:57 PM GMT+3	Yes	19	Female	Countryside	Jordan	Medicine	Undergraduate	3	Student	Family		No	No	Frequently	Rarely	Frequently	Sometimes	Sometimes	Frequently	Frequently	Frequently	Frequently	Rarely	Sometimes	Rarely	Rarely	Sometimes	Sometimes	Sometimes	Rarely	Sometimes	Sometimes	Frequently	Rarely	Frequently	Frequently	Sometimes	Rarely	Rarely	Yes	No	No	No	No	Yes	No	No	No	No
2022/09/12 4:51:46 PM GMT+3	Yes	20	Female	City	Jordan	Medicine	Undergraduate	4	Student	Family		No	No	Sometimes	Sometimes	Frequently	Frequently	Sometimes	Frequently	Sometimes	Frequently	Sometimes	Frequently	Frequently	Frequently	Rarely	Sometimes	Sometimes	Frequently	Sometimes	Sometimes	Sometimes	Frequently	Sometimes	Sometimes	Frequently	Frequently	Sometimes	Sometimes	Yes	Yes	No	No	Yes	Yes	No	Yes	No	No
2022/09/12 8:58:36 PM GMT+3	Yes	20	Male	City	Jordan	Medicine	Undergraduate	2	Student	Family	Alone	No	No	Rarely	Sometimes	Rarely	Sometimes	Sometimes	Sometimes	Sometimes	Sometimes	Rarely	Sometimes	Rarely	Sometimes	Sometimes	Sometimes	Sometimes	Sometimes	Rarely	Sometimes	Rarely	Sometimes	Sometimes	Sometimes	Rarely	Rarely	Sometimes	Sometimes	Yes	Yes	Yes	Yes	Yes	Yes	Yes	No	Yes	Yes
2022/09/12 9:51:30 PM GMT+3	Yes	20	Male	City	Jordan	Medicine	Undergraduate	2	Student	Family		No	No	Sometimes	Rarely	Rarely	Sometimes	Sometimes	Rarely	Sometimes	Sometimes	Sometimes	Sometimes	Sometimes	Sometimes	Sometimes	Sometimes	Sometimes	Sometimes	Sometimes	Sometimes	Sometimes	Sometimes	Sometimes	Sometimes	Sometimes	Sometimes	Frequently	Sometimes	Yes	Yes	Yes	Yes	Yes	Yes	Yes	Yes	Yes	No
2022/09/12 9:53:48 PM GMT+3	Yes	19	Male	Countryside	Jordan	Medicine	Postgraduate	1	Student	Family	With friends	No	Diabetes	Sometimes	Sometimes	Rarely	Rarely	Sometimes	Sometimes	Sometimes	Sometimes	Sometimes	Sometimes	Sometimes	Sometimes	Rarely	Rarely	Rarely	Rarely	Frequently	Frequently	Sometimes	Sometimes	Sometimes	Sometimes	Sometimes	Frequently	Sometimes	Sometimes	Yes	Yes	Yes	Yes	Yes	Yes	No	No	No	No
2022/09/12 9:55:53 PM GMT+3	Yes	19	Female	City	Jordan	Medicine	Undergraduate	First year	Student	Family		No	No	Sometimes	Sometimes	Sometimes	Rarely	Rarely	Rarely	Rarely	Frequently	Rarely	Sometimes	Sometimes	Rarely	Rarely	Rarely	Rarely	Sometimes	Rarely	Sometimes	Frequently	Rarely	Sometimes	Sometimes	Sometimes	Sometimes	Rarely	Rarely	No	No	No	No	No	Yes	No	No	No	No
2022/09/12 10:17:11 PM GMT+3	Yes	19	Female	City	USA	Medicine	Undergraduate	Second year	Student	Another city	Alone	No	No	Sometimes	Rarely	Rarely	Sometimes	Rarely	Rarely	Rarely	Rarely	Rarely	Rarely	Rarely	Rarely	Sometimes	Sometimes	Rarely	Rarely	Sometimes	Rarely	Sometimes	Sometimes	Sometimes	Rarely	Sometimes	Rarely	Rarely	Rarely	Yes	Yes	No	No	Yes	Yes	Yes	No	Yes	No
2022/09/12 10:33:06 PM GMT+3	Yes	20	Female	City	Jordan	Medicine	Undergraduate	2nd year	Surgery	Family		No	No	Sometimes	Sometimes	Sometimes	Rarely	Sometimes	Sometimes	Sometimes	Frequently	Frequently	Frequently	Sometimes	Rarely	Sometimes	Rarely	Rarely	Rarely	Rarely	Rarely	Rarely	Frequently	Rarely	Rarely	Rarely	Sometimes	Sometimes	Rarely	No	No	No	Yes	Yes	Yes	Yes	Yes	No	Yes
2022/09/12 11:02:18 PM GMT+3	Yes	19	Male	City	Others	Medicine	Undergraduate	1	Student	Family		No	No	Sometimes	Rarely	Sometimes	Rarely	Rarely	Rarely	Rarely	Sometimes	Sometimes	Sometimes	Sometimes	Sometimes	Sometimes	Sometimes	Rarely	Sometimes	Rarely	Rarely	Sometimes	Sometimes	Sometimes	Sometimes	Sometimes	Sometimes	Sometimes	Rarely	Yes	No	No	No	No	Yes	No	No	No	No
2022/09/12 11:48:12 PM GMT+3	Yes	20	Male	City	Jordan	Medicine	Undergraduate	First year	Student	Family		No	No	Sometimes	Rarely	Frequently	Sometimes	Sometimes	Sometimes	Frequently	Frequently	Rarely	Frequently	Rarely	Sometimes	Sometimes	Sometimes	Rarely	Sometimes	Frequently	Rarely	Frequently	Frequently	Sometimes	Sometimes	Sometimes	Sometimes	Rarely	Rarely	Yes	No	No	Yes	Yes	Yes	Yes	No	No	No
2022/09/13 4:15:34 AM GMT+3	Yes	18	Female	City	Jordan	Medicine	Undergraduate	First	Student	Family		No	No	Frequently	Rarely	Frequently	Frequently	Sometimes	Rarely	Rarely	Sometimes	Rarely	Sometimes	Rarely	Rarely	Rarely	Sometimes	Sometimes	Sometimes	Sometimes	Sometimes	Rarely	Frequently	Sometimes	Frequently	Sometimes	Sometimes	Rarely	Sometimes	Yes	No	Yes	No	No	Yes	Yes	Yes	No	No
2022/09/13 9:23:28 AM GMT+3	Yes	22	Female	City	Jordan	Medicine	Undergraduate	Just finished first year	Student	Family		No	No	Sometimes	Rarely	Sometimes	Sometimes	Sometimes	Frequently	Sometimes	Frequently	Frequently	Sometimes	Frequently	Sometimes	Rarely	Sometimes	Sometimes	Sometimes	Rarely	Rarely	Rarely	Rarely	Sometimes	Frequently	Sometimes	Sometimes	Sometimes	Rarely	No	Yes	No	No	No	Yes	Yes	No	No	No
2022/09/13 9:30:42 AM GMT+3	Yes	19	Female	City	Jordan	Medicine	Undergraduate	Second year	Student	Family		No	No	Rarely	Rarely	Sometimes	Rarely	Rarely	Sometimes	Rarely	Sometimes	Rarely	Sometimes	Rarely	Rarely	Sometimes	Rarely	Rarely	Sometimes	Sometimes	Rarely	Sometimes	Rarely	Sometimes	Sometimes	Sometimes	Sometimes	Rarely	Rarely	No	Yes	No	No	No	Yes	No	No	No	No
2022/09/14 5:59:45 AM GMT+3	Yes	21	Male	City	Jordan	Medicine	Undergraduate	4th year	Student	Family		No	No	Frequently	Sometimes	Frequently	Frequently	Frequently	Frequently	Sometimes	Frequently	Sometimes	Sometimes	Frequently	Sometimes	Rarely	Sometimes	Sometimes	Sometimes	Sometimes	Sometimes	Rarely	Sometimes	Sometimes	Frequently	Frequently	Frequently	Frequently	Frequently	Yes	Yes	No	Yes	No	Yes	No	No	Yes	Yes
2022/09/14 10:51:23 AM GMT+3	Yes	19	Female	City	Jordan	Medicine	Undergraduate	2nd year	Student	Family		No	No	Sometimes	Rarely	Rarely	Rarely	Sometimes	Sometimes	Rarely	Frequently	Sometimes	Sometimes	Sometimes	Rarely	Sometimes	Rarely	Rarely	Rarely	Rarely	Rarely	Sometimes	Sometimes	Rarely	Sometimes	Sometimes	Rarely	Rarely	Rarely	No	No	No	No	Yes	Yes	Yes	No	No	No
2022/09/15 4:33:04 PM GMT+3	Yes	19	Female	City	Jordan	Medicine	Undergraduate	2nd year	Student	Family		No	No	Sometimes	Rarely	Frequently	Frequently	Frequently	Rarely	Frequently	Frequently	Frequently	Rarely	Rarely	Rarely	Sometimes	Rarely	Rarely	Sometimes	Sometimes	Rarely	Frequently	Sometimes	Sometimes	Frequently	Sometimes	Sometimes	Sometimes	Rarely	No	No	No	No	No	Yes	No	No	No	No
2022/11/09 9:22:26 PM GMT+3	Yes	21	Male	City	Jordan	Medicine	Undergraduate	2025	Student	Family		No	No	Sometimes	Rarely	Rarely	Sometimes	Rarely	Rarely	Rarely	Sometimes	Rarely	Sometimes	Sometimes	Rarely	Rarely	Rarely	Rarely	Rarely	Frequently	Rarely	Rarely	Rarely	Rarely	Rarely	Rarely	Rarely	Rarely	Rarely	No	No	No	No	No	Yes	No	No	No	No
2022/11/09 9:38:13 PM GMT+3	Yes	19	Female	City	Jordan	Medicine	Undergraduate	2	Student	Family		No	No	Sometimes	Sometimes	Sometimes	Sometimes	Frequently	Frequently	Sometimes	Sometimes	Rarely	Rarely	Sometimes	Sometimes	Sometimes	Sometimes	Sometimes	Rarely	Sometimes	Rarely	Rarely	Rarely	Sometimes	Sometimes	Sometimes	Sometimes	Sometimes	Sometimes	No	No	No	No	No	Yes	No	Yes	No	No
2022/11/09 9:38:20 PM GMT+3	Yes	21	Male	City	Jordan	Medicine	Undergraduate	4	Student	Family		No	No	Sometimes	Rarely	Frequently	Frequently	Sometimes	Rarely	Rarely	Sometimes	Frequently	Sometimes	Rarely	Frequently	Sometimes	Sometimes	Sometimes	Sometimes	Frequently	Sometimes	Frequently	Sometimes	Rarely	Frequently	Sometimes	Sometimes	Rarely	Frequently	No	No	Yes	Yes	Yes	No	Yes	No	No	Yes
2022/11/09 9:40:27 PM GMT+3	Yes	21	Male	City	Jordan	Medicine	Undergraduate	4	Student	Family		No	No	Sometimes	Sometimes	Rarely	Rarely	Frequently	Frequently	Rarely	Sometimes	Rarely	Rarely	Sometimes	Sometimes	Sometimes	Sometimes	Rarely	Frequently	Sometimes	Rarely	Sometimes	Sometimes	Sometimes	Sometimes	Sometimes	Rarely	Rarely	Sometimes	No	Yes	No	No	Yes	Yes	No	No	No	Yes
2022/11/09 9:43:49 PM GMT+3	Yes	21	Male	City	Jordan	Medicine	Undergraduate	4	Student	Family	With friends	No	No	Sometimes	Sometimes	Sometimes	Sometimes	Sometimes	Frequently	Sometimes	Sometimes	Sometimes	Sometimes	Sometimes	Sometimes	Sometimes	Sometimes	Sometimes	Sometimes	Sometimes	Sometimes	Sometimes	Sometimes	Sometimes	Sometimes	Sometimes	Sometimes	Sometimes	Sometimes	No	No	No	No	No	No	No	No	No	No
2022/11/09 9:45:21 PM GMT+3	Yes	21	Male	Countryside	Jordan	Medicine	Undergraduate	4	Student	Another city	With friends	No	No	Frequently	Frequently	Frequently	Frequently	Rarely	Frequently	Rarely	Frequently	Frequently	Rarely	Rarely	Rarely	Rarely	Rarely	Rarely	Frequently	Sometimes	Sometimes	Rarely	Sometimes	Sometimes	Sometimes	Sometimes	Sometimes	Rarely	Rarely	Yes	Yes	No	No	No	Yes	Yes	No	Yes	Yes
2022/11/09 9:55:58 PM GMT+3	Yes	21	Male	City	Jordan	Medicine	Undergraduate	4	Student	Family		No	Others	Rarely	Rarely	Sometimes	Sometimes	Sometimes	Rarely	Rarely	Sometimes	Rarely	Rarely	Rarely	Sometimes	Rarely	Sometimes	Sometimes	Rarely	Rarely	Rarely	Rarely	Rarely	Rarely	Sometimes	Sometimes	Sometimes	Sometimes	Sometimes	Yes	Yes	Yes	Yes	Yes	Yes	No	No	No	Yes
2022/11/09 9:58:18 PM GMT+3	Yes	21	Male	City	Jordan	Medicine	Undergraduate	4	Student	Family		Yes	Hypertension	Frequently	Rarely	Sometimes	Frequently	Rarely	Rarely	Rarely	Frequently	Rarely	Sometimes	Sometimes	Rarely	Frequently	Rarely	Rarely	Rarely	Frequently	Frequently	Rarely	Frequently	Frequently	Sometimes	Frequently	Sometimes	Sometimes	Sometimes	No	Yes	No	No	Yes	Yes	Yes	Yes	Yes	Yes
2022/11/09 10:06:10 PM GMT+3	Yes	21	Female	Countryside	Jordan	Medicine	Undergraduate	4th year	Student	Family		No	No	Sometimes	Rarely	Rarely	Sometimes	Rarely	Rarely	Rarely	Sometimes	Rarely	Rarely	Rarely	Rarely	Rarely	Rarely	Rarely	Rarely	Rarely	Rarely	Sometimes	Sometimes	Rarely	Rarely	Rarely	Rarely	Sometimes	Rarely	No	No	No	No	No	No	No	No	No	No
2022/11/09 10:22:44 PM GMT+3	Yes	19	Female	Countryside	Jordan	Medicine	Undergraduate	2ed	Student	Family		No	No	Frequently	Frequently	Sometimes	Frequently	Frequently	Frequently	Frequently	Frequently	Sometimes	Frequently	Frequently	Sometimes	Frequently	Frequently	Sometimes	Frequently	Rarely	Sometimes	Frequently	Frequently	Frequently	Sometimes	Frequently	Sometimes	Frequently	Frequently	Yes	Yes	No	Yes	Yes	Yes	No	No	No	No
2022/11/09 10:28:08 PM GMT+3	Yes	22	Female	Countryside	Jordan	Medicine	Undergraduate	4th year	Student	Family		No	No	Sometimes	Rarely	Sometimes	Sometimes	Sometimes	Sometimes	Sometimes	Frequently	Frequently	Rarely	Sometimes	Rarely	Rarely	Sometimes	Rarely	Rarely	Rarely	Sometimes	Rarely	Sometimes	Sometimes	Sometimes	Sometimes	Frequently	Sometimes	Sometimes	No	No	No	No	No	Yes	No	No	No	No
2022/11/09 11:30:06 PM GMT+3	Yes	23	Female	City	Jordan	Medicine	Undergraduate	6th year	Student	Family		No	No	Sometimes	Rarely	Sometimes	Rarely	Sometimes	Sometimes	Sometimes	Sometimes	Rarely	Sometimes	Sometimes	Sometimes	Sometimes	Frequently	Rarely	Frequently	Sometimes	Sometimes	Rarely	Rarely	Sometimes	Sometimes	Sometimes	Rarely	Sometimes	Sometimes	Yes	No	No	No	No	No	Yes	No	No	No
2022/11/10 12:49:26 AM GMT+3	Yes	21	Male	City	Jordan	Medicine	Undergraduate	4th	Student	Family		No	No	Rarely	Rarely	Frequently	Sometimes	Sometimes	Frequently	Sometimes	Frequently	Rarely	Sometimes	Sometimes	Rarely	Rarely	Rarely	Rarely	Frequently	Rarely	Rarely	Rarely	Frequently	Frequently	Rarely	Sometimes	Rarely	Sometimes	Rarely	No	Yes	No	No	Yes	Yes	Yes	No	Yes	Yes
2022/11/10 1:15:16 AM GMT+3	Yes	22	Female	City	Jordan	Medicine	Undergraduate	4	Student	Family	Alone	No	No	Rarely	Frequently	Sometimes	Rarely	Rarely	Rarely	Rarely	Rarely	Sometimes	Rarely	Rarely	Rarely	Sometimes	Rarely	Sometimes	Rarely	Rarely	Rarely	Rarely	Sometimes	Sometimes	Rarely	Rarely	Rarely	Sometimes	Sometimes	No	No	No	No	Yes	No	Yes	Yes	No	No
2022/11/10 1:38:35 AM GMT+3	Yes	20	Female	City	Jordan	Medicine	Undergraduate	2nd year	Student	Family		No	No	Sometimes	Rarely	Rarely	Sometimes	Rarely	Rarely	Rarely	Rarely	Rarely	Rarely	Rarely	Rarely	Rarely	Rarely	Rarely	Sometimes	Rarely	Rarely	Sometimes	Sometimes	Sometimes	Rarely	Sometimes	Sometimes	Sometimes	Rarely	No	No	No	No	No	Yes	No	Yes	No	No
2022/11/10 3:12:17 AM GMT+3	Yes	21	Female	City	Jordan	Medicine	Undergraduate	4th	Student	Another city	With friends	No	No	Sometimes	Sometimes	Sometimes	Rarely	Sometimes	Rarely	Rarely	Sometimes	Sometimes	Rarely	Rarely	Rarely	Rarely	Rarely	Rarely	Rarely	Frequently	Sometimes	Rarely	Sometimes	Sometimes	Sometimes	Sometimes	Sometimes	Sometimes	Sometimes	No	No	No	No	No	Yes	No	Yes	No	Yes
2022/11/10 8:55:05 AM GMT+3	Yes	20	Male	City	Jordan	Medicine	Undergraduate	4th	Student	Family		No	No	Sometimes	Rarely	Frequently	Sometimes	Sometimes	Sometimes	Sometimes	Sometimes	Sometimes	Sometimes	Sometimes	Sometimes	Frequently	Rarely	Sometimes	Rarely	Rarely	Sometimes	Rarely	Rarely	Rarely	Sometimes	Sometimes	Sometimes	Rarely	Rarely	Yes	No	No	No	No	Yes	Yes	No	No	No
2022/11/10 9:09:17 AM GMT+3	Yes	21	Male	City	Jordan	Medicine	Undergraduate	4	Student	Family		No	No	Sometimes	Rarely	Sometimes	Rarely	Rarely	Rarely	Sometimes	Rarely	Rarely	Sometimes	Rarely	Sometimes	Sometimes	Rarely	Sometimes	Frequently	Sometimes	Rarely	Rarely	Rarely	Rarely	Sometimes	Sometimes	Rarely	Rarely	Rarely	Yes	No	No	Yes	No	No	Yes	No	No	No
2022/11/10 9:19:19 AM GMT+3	Yes	19	Female	City	Jordan	Medicine	Undergraduate	Second year	Student	Family		No	No	Sometimes	Rarely	Sometimes	Sometimes	Sometimes	Sometimes	Frequently	Sometimes	Sometimes	Rarely	Sometimes	Rarely	Rarely	Rarely	Rarely	Sometimes	Sometimes	Frequently	Rarely	Sometimes	Rarely	Frequently	Frequently	Rarely	Sometimes	Sometimes	Yes	Yes	No	No	No	Yes	No	No	Yes	Yes
2022/11/10 2:39:01 PM GMT+3	Yes	20	Female	City	Others	Medicine	Undergraduate	2	Student	Family		No	No	Sometimes	Sometimes	Sometimes	Sometimes	Sometimes	Frequently	Sometimes	Frequently	Rarely	Sometimes	Frequently	Rarely	Rarely	Sometimes	Rarely	Rarely	Frequently	Frequently	Frequently	Frequently	Frequently	Frequently	Frequently	Sometimes	Sometimes	Sometimes	Yes	No	Yes	Yes	Yes	No	No	Yes	Yes	No
2022/11/10 4:03:55 PM GMT+3	Yes	21	Female	City	Jordan	Medicine	Undergraduate	4th	Student	Family	Alone	No	No	Frequently	Rarely	Sometimes	Sometimes	Sometimes	Sometimes	Sometimes	Sometimes	Rarely	Sometimes	Rarely	Sometimes	Rarely	Rarely	Rarely	Sometimes	Rarely	Rarely	Sometimes	Sometimes	Sometimes	Sometimes	Sometimes	Sometimes	Sometimes	Rarely	No	No	No	No	No	Yes	No	No	No	No
2022/11/10 6:09:14 PM GMT+3	Yes	22	Female	Countryside	Jordan	Medicine	Undergraduate	4th	Student	Another city	With friends	No	No	Sometimes	Rarely	Sometimes	Sometimes	Sometimes	Rarely	Rarely	Frequently	Frequently	Frequently	Frequently	Rarely	Rarely	Rarely	Rarely	Frequently	Rarely	Rarely	Frequently	Frequently	Sometimes	Frequently	Sometimes	Sometimes	Rarely	Rarely	No	No	No	No	No	Yes	Yes	No	No	Yes
2022/11/10 10:19:20 PM GMT+3	Yes	21	Male	City	Jordan	Medicine	Undergraduate	4	Student	Family	Alone	No	No	Rarely	Frequently	Frequently	Sometimes	Sometimes	Rarely	Sometimes	Frequently	Rarely	Frequently	Frequently	Sometimes	Rarely	Rarely	Rarely	Frequently	Sometimes	Sometimes	Frequently	Frequently	Frequently	Sometimes	Frequently	Sometimes	Sometimes	Sometimes	Yes	Yes	No	No	No	No	No	No	No	No
2022/11/11 10:17:14 AM GMT+3	Yes	23	Male	City	Jordan	Medicine	Undergraduate	4	Student	Another city	With friends	Yes	Hypertension	Rarely	Rarely	Sometimes	Rarely	Sometimes	Sometimes	Rarely	Frequently	Frequently	Sometimes	Sometimes	Sometimes	Sometimes	Rarely	Rarely	Rarely	Frequently	Rarely	Sometimes	Sometimes	Sometimes	Sometimes	Sometimes	Frequently	Sometimes	Sometimes	Yes	Yes	No	No	Yes	Yes	Yes	Yes	No	Yes
2022/11/11 10:19:36 AM GMT+3	Yes	19	Female	City	Jordan	Medicine	Undergraduate	2	Student	Family		No	No	Sometimes	Sometimes	Sometimes	Rarely	Sometimes	Sometimes	Rarely	Sometimes	Frequently	Sometimes	Sometimes	Sometimes	Frequently	Frequently	Sometimes	Sometimes	Sometimes	Frequently	Frequently	Sometimes	Sometimes	Sometimes	Sometimes	Sometimes	Rarely	Sometimes	Yes	Yes	No	No	No	No	Yes	Yes	No	No
2022/11/11 10:21:44 AM GMT+3	Yes	24	Female	Countryside	Jordan	Medicine	Undergraduate	6	Student	Another city	Alone	Yes	Diabetes	Sometimes	Sometimes	Sometimes	Sometimes	Sometimes	Rarely	Frequently	Sometimes	Sometimes	Rarely	Sometimes	Sometimes	Sometimes	Rarely	Sometimes	Sometimes	Sometimes	Sometimes	Frequently	Sometimes	Sometimes	Sometimes	Rarely	Sometimes	Sometimes	Sometimes	Yes	Yes	Yes	No	Yes	Yes	Yes	Yes	Yes	No
2022/11/11 8:05:14 PM GMT+3	Yes	21	Female	City	Jordan	Medicine	Undergraduate	4	Student	Family		No	No	Rarely	Rarely	Sometimes	Rarely	Frequently	Sometimes	Rarely	Frequently	Rarely	Sometimes	Rarely	Rarely	Rarely	Sometimes	Rarely	Sometimes	Sometimes	Rarely	Frequently	Sometimes	Rarely	Rarely	Rarely	Rarely	Rarely	Rarely	Yes	No	No	No	No	No	Yes	No	No	Yes
2022/11/11 8:05:19 PM GMT+3	Yes	20	Female	City	Jordan	Medicine	Undergraduate	3	Student	Family		No	No	Sometimes	Rarely	Frequently	Rarely	Rarely	Sometimes	Sometimes	Sometimes	Sometimes	Rarely	Rarely	Rarely	Rarely	Rarely	Rarely	Sometimes	Sometimes	Sometimes	Sometimes	Sometimes	Sometimes	Sometimes	Sometimes	Rarely	Rarely	Rarely	No	No	No	No	No	Yes	Yes	No	No	No
2022/11/11 8:09:45 PM GMT+3	Yes	20	Female	City	Jordan	Medicine	Undergraduate	Third year	Student	Family	Alone	No	No	Sometimes	Sometimes	Rarely	Rarely	Rarely	Sometimes	Rarely	Rarely	Rarely	Sometimes	Sometimes	Rarely	Rarely	Sometimes	Sometimes	Rarely	Sometimes	Sometimes	Sometimes	Frequently	Sometimes	Sometimes	Sometimes	Sometimes	Sometimes	Rarely	Yes	No	No	No	No	Yes	Yes	No	Yes	No
2022/11/11 8:10:47 PM GMT+3	Yes	20	Female	City	Jordan	Medicine	Undergraduate	3	Student	Family		No	No	Sometimes	Sometimes	Frequently	Rarely	Sometimes	Rarely	Rarely	Sometimes	Rarely	Frequently	Sometimes	Rarely	Sometimes	Rarely	Sometimes	Frequently	Rarely	Sometimes	Sometimes	Frequently	Rarely	Frequently	Frequently	Sometimes	Sometimes	Rarely	Yes	Yes	Yes	No	No	Yes	No	No	No	No
2022/11/11 8:11:51 PM GMT+3	Yes	19	Female	City	Jordan	Medicine	Undergraduate	2nd year	Student	Another city	Alone	No	No	Rarely	Rarely	Sometimes	Sometimes	Sometimes	Sometimes	Sometimes	Sometimes	Sometimes	Rarely	Sometimes	Rarely	Rarely	Rarely	Rarely	Rarely	Sometimes	Sometimes	Sometimes	Sometimes	Sometimes	Sometimes	Sometimes	Sometimes	Rarely	Sometimes	Yes	No	No	No	No	Yes	No	No	No	No
2022/11/11 8:11:56 PM GMT+3	Yes	21	Female	Countryside	Jordan	Medicine	Undergraduate	Fourth	Student	Family		No	No	Rarely	Sometimes	Sometimes	Rarely	Sometimes	Rarely	Rarely	Sometimes	Sometimes	Sometimes	Sometimes	Frequently	Rarely	Sometimes	Rarely	Sometimes	Frequently	Rarely	Frequently	Frequently	Sometimes	Sometimes	Sometimes	Sometimes	Rarely	Rarely	No	Yes	Yes	Yes	Yes	Yes	No	Yes	No	Yes
2022/11/11 8:13:58 PM GMT+3	Yes	21	Female	City	Jordan	Medicine	Undergraduate	4th	Student	Family	With friends	No	No	Frequently	Frequently	Frequently	Sometimes	Frequently	Sometimes	Sometimes	Frequently	Sometimes	Sometimes	Sometimes	Sometimes	Sometimes	Sometimes	Sometimes	Sometimes	Sometimes	Rarely	Sometimes	Sometimes	Sometimes	Sometimes	Sometimes	Sometimes	Sometimes	Sometimes	Yes	Yes	No	No	No	Yes	No	No	No	No
2022/11/11 8:25:27 PM GMT+3	Yes	21	Female	City	Jordan	Medicine	Undergraduate	Third year	Student	Family		No	No	Sometimes	Rarely	Rarely	Rarely	Sometimes	Sometimes	Sometimes	Rarely	Rarely	Sometimes	Rarely	Rarely	Sometimes	Sometimes	Rarely	Sometimes	Rarely	Sometimes	Frequently	Sometimes	Sometimes	Rarely	Sometimes	Rarely	Rarely	Rarely	No	No	No	No	No	Yes	No	No	No	No
2022/11/11 8:43:47 PM GMT+3	Yes	20	Female	City	Jordan	Medicine	Undergraduate	3rd	Student	Family		No	No	Frequently	Rarely	Frequently	Sometimes	Sometimes	Frequently	Sometimes	Frequently	Sometimes	Sometimes	Sometimes	Frequently	Rarely	Frequently	Frequently	Frequently	Frequently	Frequently	Frequently	Frequently	Frequently	Frequently	Frequently	Frequently	Frequently	Rarely	No	No	No	No	No	Yes	No	No	No	No
2022/11/11 8:47:01 PM GMT+3	Yes	19	Female	City	Jordan	Medicine	Undergraduate	3	Student	Family		No	No	Sometimes	Rarely	Rarely	Rarely	Sometimes	Sometimes	Rarely	Rarely	Rarely	Sometimes	Rarely	Rarely	Rarely	Rarely	Rarely	Frequently	Rarely	Rarely	Rarely	Frequently	Frequently	Rarely	Rarely	Rarely	Rarely	Rarely	No	Yes	No	No	Yes	No	No	No	No	No
2022/11/11 9:07:43 PM GMT+3	Yes	20	Female	City	Jordan	Medicine	Undergraduate	3rd	Student	Family		No	No	Sometimes	Rarely	Sometimes	Rarely	Sometimes	Sometimes	Sometimes	Sometimes	Rarely	Rarely	Sometimes	Sometimes	Rarely	Rarely	Sometimes	Sometimes	Rarely	Sometimes	Frequently	Frequently	Rarely	Rarely	Sometimes	Rarely	Sometimes	Sometimes	Yes	Yes	Yes	Yes	No	No	No	No	Yes	Yes
2022/11/11 9:29:31 PM GMT+3	Yes	19	Female	City	Jordan	Pharmacy	Undergraduate	2	Clinical Nutrition and Dietetics	Family		Yes	Others	Rarely	Rarely	Frequently	Frequently	Frequently	Sometimes	Rarely	Frequently	Rarely	Frequently	Rarely	Rarely	Sometimes	Sometimes	Sometimes	Frequently	Rarely	Sometimes	Sometimes	Rarely	Sometimes	Frequently	Sometimes	Rarely	Sometimes	Rarely	No	No	No	No	Yes	No	Yes	No	No	No
2022/11/11 9:30:29 PM GMT+3	Yes	20	Female	City	Jordan	Medicine	Undergraduate	2	Student	Family		No	No	Sometimes	Rarely	Sometimes	Sometimes	Sometimes	Sometimes	Sometimes	Frequently	Frequently	Frequently	Frequently	Sometimes	Sometimes	Frequently	Rarely	Frequently	Sometimes	Sometimes	Frequently	Frequently	Frequently	Sometimes	Frequently	Sometimes	Sometimes	Sometimes	Yes	No	No	No	Yes	No	No	No	Yes	No
2022/11/11 9:56:09 PM GMT+3	Yes	20	Female	Countryside	Jordan	Medicine	Undergraduate	Third	Student	Family	With friends	No	No	Sometimes	Rarely	Sometimes	Sometimes	Sometimes	Sometimes	Sometimes	Sometimes	Sometimes	Sometimes	Sometimes	Sometimes	Sometimes	Sometimes	Sometimes	Sometimes	Frequently	Sometimes	Sometimes	Sometimes	Sometimes	Sometimes	Sometimes	Sometimes	Sometimes	Sometimes	No	No	No	No	No	No	No	No	No	No
2022/11/11 10:14:55 PM GMT+3	Yes	20	Female	City	Jordan	Medicine	Undergraduate	3	Student	Family		No	No	Sometimes	Rarely	Rarely	Rarely	Rarely	Rarely	Sometimes	Sometimes	Sometimes	Rarely	Sometimes	Rarely	Rarely	Rarely	Rarely	Rarely	Rarely	Sometimes	Frequently	Sometimes	Sometimes	Sometimes	Sometimes	Rarely	Rarely	Rarely	Yes	No	No	No	No	Yes	No	No	Yes	No
2022/11/11 10:28:09 PM GMT+3	Yes	19	Female	City	Jordan	Medicine	Undergraduate	Second year	Student	Family		No	No	Rarely	Rarely	Sometimes	Sometimes	Frequently	Sometimes	Frequently	Sometimes	Frequently	Frequently	Frequently	Sometimes	Frequently	Sometimes	Sometimes	Sometimes	Rarely	Rarely	Rarely	Sometimes	Sometimes	Sometimes	Sometimes	Frequently	Frequently	Rarely	Yes	Yes	No	No	No	Yes	Yes	No	No	No
2022/11/12 1:54:21 AM GMT+3	Yes	20	Female	City	Jordan	Medicine	Undergraduate	3	Student	Family	Alone	No	No	Rarely	Rarely	Rarely	Rarely	Sometimes	Rarely	Rarely	Sometimes	Sometimes	Rarely	Rarely	Rarely	Rarely	Rarely	Rarely	Rarely	Rarely	Sometimes	Rarely	Sometimes	Rarely	Rarely	Rarely	Rarely	Rarely	Rarely	Yes	No	No	No	Yes	Yes	No	Yes	No	No
2022/11/12 12:04:16 PM GMT+3	Yes	20	Female	City	Jordan	Medicine	Undergraduate	4	Student	Family	Alone	Yes	No	Rarely	Rarely	Rarely	Rarely	Frequently	Rarely	Rarely	Rarely	Rarely	Rarely	Rarely	Rarely	Rarely	Rarely	Rarely	Rarely	Rarely	Rarely	Rarely	Rarely	Rarely	Rarely	Rarely	Rarely	Rarely	Rarely	Yes	Yes	Yes	Yes	Yes	Yes	No	No	No	No
2022/11/12 12:16:45 PM GMT+3	Yes	21	Female	City	Jordan	Medicine	Undergraduate	4th year	Student	Family		No	No	Rarely	Rarely	Sometimes	Rarely	Rarely	Sometimes	Rarely	Sometimes	Rarely	Rarely	Rarely	Rarely	Rarely	Rarely	Sometimes	Rarely	Sometimes	Rarely	Sometimes	Sometimes	Sometimes	Sometimes	Rarely	Rarely	Sometimes	Rarely	No	No	No	No	No	Yes	No	Yes	No	No
2022/11/13 11:41:48 PM GMT+3	Yes	19	Female	Countryside	Jordan	Medicine	Undergraduate	2nd year	Student	Family		No	No	Rarely	Sometimes	Rarely	Frequently	Frequently	Frequently	Rarely	Frequently	Rarely	Frequently	Rarely	Sometimes	Sometimes	Sometimes	Sometimes	Frequently	Frequently	Sometimes	Frequently	Sometimes	Frequently	Frequently	Frequently	Sometimes	Rarely	Rarely	Yes	Yes	No	No	Yes	No	No	No	No	No
2022/11/14 2:10:00 PM GMT+3	Yes	21	Female	City	Jordan	Medicine	Undergraduate	4	Student	Family		Yes	Hypertension	Frequently	Rarely	Sometimes	Sometimes	Rarely	Sometimes	Sometimes	Rarely	Rarely	Sometimes	Rarely	Sometimes	Frequently	Sometimes	Sometimes	Sometimes	Frequently	Sometimes	Rarely	Frequently	Sometimes	Sometimes	Sometimes	Rarely	Sometimes	Sometimes	Yes	Yes	No	No	No	Yes	No	No	No	No
2022/11/14 8:44:59 PM GMT+3	Yes	21	Female	City	Jordan	Medicine	Undergraduate	4th year	Student	Family		No	No	Sometimes	Rarely	Rarely	Sometimes	Frequently	Sometimes	Sometimes	Sometimes	Rarely	Frequently	Sometimes	Sometimes	Rarely	Frequently	Rarely	Rarely	Rarely	Rarely	Frequently	Frequently	Sometimes	Sometimes	Sometimes	Rarely	Sometimes	Sometimes	Yes	Yes	No	No	No	Yes	Yes	Yes	No	No
2022/11/15 5:40:34 PM GMT+3	Yes	19	Female	City	Jordan	Medicine	Undergraduate	2	Student	Family		No	No	Sometimes	Sometimes	Frequently	Rarely	Frequently	Frequently	Frequently	Frequently	Sometimes	Rarely	Sometimes	Sometimes	Sometimes	Rarely	Sometimes	Sometimes	Rarely	Rarely	Rarely	Rarely	Sometimes	Sometimes	Sometimes	Sometimes	Rarely	Frequently	Yes	No	No	No	No	No	No	No	No	No
2022/11/15 6:38:32 PM GMT+3	Yes	20	Female	Countryside	Jordan	Medicine	Undergraduate	3	Student	Family		No	No	Rarely	Sometimes	Sometimes	Rarely	Sometimes	Sometimes	Sometimes	Sometimes	Rarely	Rarely	Sometimes	Sometimes	Rarely	Rarely	Rarely	Rarely	Rarely	Sometimes	Sometimes	Sometimes	Sometimes	Sometimes	Sometimes	Sometimes	Rarely	Rarely	Yes	No	No	No	Yes	Yes	No	Yes	No	No
2022/12/17 11:43:13 PM GMT+3	Yes	18	Male	City	Jordan	Medicine	Undergraduate	1	Student	Family		No	No	Sometimes	Sometimes	Sometimes	Sometimes	Sometimes	Rarely	Frequently	Sometimes	Sometimes	Frequently	Sometimes	Rarely	Sometimes	Sometimes	Sometimes	Sometimes	Rarely	Sometimes	Sometimes	Sometimes	Rarely	Rarely	Sometimes	Sometimes	Rarely	Sometimes	Yes	Yes	Yes	No	Yes	Yes	No	Yes	Yes	No
2022/12/17 11:45:12 PM GMT+3	Yes	20	Female	City	Jordan	Medicine	Undergraduate	2	Student	Family		Yes	Hypertension	Sometimes	Rarely	Rarely	Rarely	Rarely	Sometimes	Rarely	Rarely	Rarely	Rarely	Rarely	Rarely	Sometimes	Sometimes	Rarely	Rarely	Sometimes	Sometimes	Rarely	Rarely	Rarely	Sometimes	Sometimes	Rarely	Sometimes	Sometimes	Yes	Yes	No	No	No	No	No	No	Yes	No
2022/12/17 11:48:55 PM GMT+3	Yes	21	Male	Countryside	Jordan	Medicine	Undergraduate	3	Student	Family		Yes	Diabetes	Sometimes	Sometimes	Rarely	Sometimes	Sometimes	Sometimes	Sometimes	Sometimes	Sometimes	Rarely	Sometimes	Sometimes	Frequently	Frequently	Sometimes	Rarely	Sometimes	Rarely	Sometimes	Rarely	Rarely	Sometimes	Sometimes	Sometimes	Sometimes	Rarely	Yes	Yes	No	Yes	Yes	Yes	Yes	Yes	Yes	Yes
2022/12/17 11:51:57 PM GMT+3	Yes	22	Female	Countryside	Jordan	Medicine	Undergraduate	4	Student	Family		Yes	Heart disease	Sometimes	Rarely	Rarely	Rarely	Sometimes	Rarely	Sometimes	Sometimes	Sometimes	Sometimes	Frequently	Sometimes	Sometimes	Sometimes	Sometimes	Rarely	Rarely	Frequently	Frequently	Frequently	Frequently	Sometimes	Sometimes	Sometimes	Sometimes	Frequently	Yes	Yes	Yes	No	No	Yes	Yes	Yes	No	No
2022/12/17 11:55:01 PM GMT+3	Yes	19	Male	City	Jordan	Medicine	Undergraduate	2	Student	Another city	Alone	No	No	Sometimes	Sometimes	Sometimes	Rarely	Sometimes	Rarely	Sometimes	Sometimes	Sometimes	Rarely	Sometimes	Sometimes	Sometimes	Sometimes	Sometimes	Sometimes	Sometimes	Sometimes	Sometimes	Sometimes	Sometimes	Sometimes	Sometimes	Sometimes	Sometimes	Frequently	No	Yes	Yes	No	Yes	Yes	Yes	No	Yes	No
2022/12/17 11:59:00 PM GMT+3	Yes	20	Male	City	Jordan	Medicine	Undergraduate	2	Student	Family		Yes	Renal disease	Sometimes	Sometimes	Rarely	Rarely	Rarely	Rarely	Sometimes	Frequently	Sometimes	Sometimes	Sometimes	Sometimes	Sometimes	Sometimes	Sometimes	Sometimes	Sometimes	Sometimes	Sometimes	Sometimes	Sometimes	Sometimes	Sometimes	Frequently	Sometimes	Sometimes	Yes	No	No	Yes	Yes	No	No	Yes	No	Yes
2022/12/18 12:00:48 AM GMT+3	Yes	23	Male	Countryside	Jordan	Medicine	Undergraduate	5	Student	Family		No	No	Sometimes	Sometimes	Rarely	Sometimes	Rarely	Sometimes	Sometimes	Sometimes	Sometimes	Sometimes	Sometimes	Sometimes	Rarely	Sometimes	Frequently	Sometimes	Sometimes	Sometimes	Sometimes	Sometimes	Sometimes	Sometimes	Frequently	Rarely	Sometimes	Sometimes	No	Yes	Yes	Yes	No	No	No	No	Yes	Yes
2022/12/18 12:13:06 AM GMT+3	Yes	24	Female	City	Jordan	Medicine	Undergraduate	5	Student	Family		No	No	Sometimes	Sometimes	Sometimes	Sometimes	Sometimes	Rarely	Rarely	Sometimes	Sometimes	Frequently	Frequently	Sometimes	Sometimes	Sometimes	Rarely	Sometimes	Sometimes	Rarely	Sometimes	Sometimes	Rarely	Rarely	Rarely	Rarely	Rarely	Sometimes	Yes	Yes	No	No	No	Yes	Yes	Yes	No	Yes
2022/12/18 12:17:17 AM GMT+3	Yes	19	Male	City	Jordan	Medicine	Undergraduate	2	Student	Family		Yes	Others	Frequently	Frequently	Frequently	Frequently	Frequently	Frequently	Frequently	Frequently	Sometimes	Sometimes	Frequently	Sometimes	Sometimes	Frequently	Sometimes	Sometimes	Frequently	Frequently	Sometimes	Sometimes	Frequently	Sometimes	Sometimes	Sometimes	Sometimes	Frequently	Yes	Yes	Yes	Yes	Yes	Yes	No	No	Yes	Yes
2022/12/18 12:27:30 AM GMT+3	Yes	22	Male	City	Jordan	Medicine	Undergraduate	3	Student	Family		No	No	Rarely	Sometimes	Sometimes	Sometimes	Sometimes	Sometimes	Sometimes	Frequently	Frequently	Sometimes	Sometimes	Sometimes	Frequently	Sometimes	Rarely	Rarely	Rarely	Rarely	Rarely	Rarely	Sometimes	Rarely	Sometimes	Sometimes	Rarely	Sometimes	No	Yes	No	Yes	No	Yes	No	Yes	No	Yes
2022/12/18 12:35:28 AM GMT+3	Yes	21	Male	City	Jordan	Medicine	Undergraduate	2	Student	Family		Yes	Diabetes	Sometimes	Sometimes	Rarely	Sometimes	Sometimes	Rarely	Sometimes	Sometimes	Rarely	Rarely	Rarely	Rarely	Sometimes	Sometimes	Sometimes	Sometimes	Sometimes	Sometimes	Rarely	Sometimes	Sometimes	Sometimes	Sometimes	Sometimes	Sometimes	Sometimes	No	No	No	No	No	No	Yes	Yes	Yes	Yes
2023/01/24 3:32:39 PM GMT+3	Yes	24	Male	City	Jordan	Medicine	Undergraduate	6	Student	Family		No	No	Sometimes	Sometimes	Rarely	Frequently	Rarely	Rarely	Sometimes	Sometimes	Sometimes	Sometimes	Sometimes	Sometimes	Sometimes	Frequently	Sometimes	Sometimes	Rarely	Sometimes	Rarely	Sometimes	Sometimes	Sometimes	Sometimes	Rarely	Sometimes	Sometimes	Yes	Yes	No	Yes	Yes	Yes	No	Yes	Yes	Yes
2023/01/24 3:34:07 PM GMT+3	Yes	23	Female	City	Jordan	Medicine	Undergraduate	5	Student	Family		No	No	Sometimes	Frequently	Sometimes	Sometimes	Frequently	Sometimes	Sometimes	Sometimes	Sometimes	Sometimes	Rarely	Sometimes	Sometimes	Sometimes	Sometimes	Sometimes	Sometimes	Sometimes	Frequently	Sometimes	Sometimes	Sometimes	Frequently	Sometimes	Rarely	Sometimes	No	No	No	Yes	No	No	No	No	No	Yes
2023/01/24 3:38:14 PM GMT+3	Yes	22	Male	City	Jordan	Medicine	Undergraduate	4	Student	Family		Yes	Diabetes	Sometimes	Frequently	Rarely	Sometimes	Sometimes	Sometimes	Sometimes	Sometimes	Sometimes	Sometimes	Sometimes	Sometimes	Rarely	Rarely	Rarely	Rarely	Sometimes	Sometimes	Sometimes	Rarely	Sometimes	Rarely	Sometimes	Sometimes	Rarely	Rarely	No	No	No	No	Yes	No	No	No	Yes	No
2023/01/24 3:43:49 PM GMT+3	Yes	21	Male	City	Jordan	Medicine	Undergraduate	4	Student	Another city	With friends	No	No	Sometimes	Sometimes	Sometimes	Sometimes	Sometimes	Sometimes	Rarely	Sometimes	Sometimes	Sometimes	Sometimes	Rarely	Sometimes	Sometimes	Sometimes	Rarely	Sometimes	Frequently	Sometimes	Sometimes	Sometimes	Rarely	Frequently	Sometimes	Sometimes	Rarely	Yes	No	Yes	No	No	No	No	No	No	No
2023/01/24 3:45:09 PM GMT+3	Yes	23	Female	Countryside	Jordan	Medicine	Undergraduate		Student	Family		No	No	Sometimes	Sometimes	Rarely	Rarely	Rarely	Rarely	Rarely	Rarely	Sometimes	Rarely	Rarely	Sometimes	Sometimes	Sometimes	Rarely	Rarely	Sometimes	Sometimes	Frequently	Sometimes	Sometimes	Sometimes	Sometimes	Rarely	Sometimes	Sometimes	No	No	No	Yes	No	No	Yes	No	Yes	Yes
2023/01/24 3:46:34 PM GMT+3	Yes	20	Male	City	Jordan	Medicine	Undergraduate	2	Student	Family		No	No	Sometimes	Sometimes	Rarely	Rarely	Frequently	Frequently	Frequently	Sometimes	Sometimes	Sometimes	Frequently	Frequently	Frequently	Sometimes	Sometimes	Sometimes	Sometimes	Sometimes	Frequently	Sometimes	Sometimes	Sometimes	Sometimes	Sometimes	Sometimes	Sometimes	Yes	Yes	Yes	Yes	No	No	No	Yes	Yes	No
2023/01/24 3:48:33 PM GMT+3	Yes	19	Male	Countryside	Jordan	Medicine	Undergraduate	1	Student	Family		No	No	Frequently	Frequently	Sometimes	Sometimes	Sometimes	Frequently	Sometimes	Frequently	Rarely	Sometimes	Sometimes	Frequently	Rarely	Sometimes	Sometimes	Sometimes	Sometimes	Frequently	Sometimes	Frequently	Sometimes	Sometimes	Frequently	Sometimes	Sometimes	Sometimes	No	Yes	No	Yes	No	Yes	No	Yes	No	Yes
2023/01/24 3:51:32 PM GMT+3	Yes	24	Female	City	Jordan	Medicine	Undergraduate	4th	Student	Family		Yes	Heart disease	Frequently	Rarely	Sometimes	Sometimes	Rarely	Sometimes	Sometimes	Sometimes	Frequently	Sometimes	Sometimes	Sometimes	Frequently	Sometimes	Rarely	Sometimes	Sometimes	Sometimes	Sometimes	Rarely	Frequently	Sometimes	Frequently	Sometimes	Sometimes	Frequently	No	No	No	No	No	No	No	No	Yes	Yes
2023/01/24 3:53:30 PM GMT+3	Yes	22	Male	City	Jordan	Medicine	Undergraduate	4	Student	Family		Yes	Others	Sometimes	Sometimes	Rarely	Sometimes	Rarely	Sometimes	Sometimes	Sometimes	Sometimes	Sometimes	Rarely	Sometimes	Rarely	Sometimes	Rarely	Rarely	Sometimes	Frequently	Frequently	Rarely	Frequently	Sometimes	Sometimes	Sometimes	Frequently	Frequently	No	Yes	No	No	No	Yes	Yes	No	No	No
2023/01/24 3:56:19 PM GMT+3	Yes	21	Male	Countryside	Jordan	Medicine	Undergraduate	4	Student	Another city	With friends	No	No	Sometimes	Rarely	Sometimes	Sometimes	Sometimes	Rarely	Sometimes	Sometimes	Sometimes	Sometimes	Frequently	Sometimes	Sometimes	Sometimes	Rarely	Rarely	Sometimes	Sometimes	Frequently	Sometimes	Sometimes	Sometimes	Rarely	Sometimes	Frequently	Frequently	No	No	No	No	No	No	No	No	No	No
2021-12-22 21:38:17	Yes	41	Female	Urban	Egypt	Medicine	Postgraduate		Others	Family	With friends	Yes	Hypertension	Frequently	Seldom	Sometimes	Sometimes	Frequently	Sometimes	Sometimes	Frequently	Sometimes	Seldom	Seldom	Sometimes	Seldom	Sometimes	Seldom	Sometimes	Seldom	Frequently	Sometimes	Frequently	Frequently	Sometimes	Frequently	Sometimes	Seldom	Sometimes	No	No	Yes	No	No	No	Yes	No	Yes	Yes
2021-12-22 21:46:59	Yes	30	Female	Urban	USA	Medicine	Postgraduate		Histology	Family	Alone	No	Hypertension	Seldom	Frequently	Seldom	Sometimes	Sometimes	Sometimes	Seldom	Sometimes	Seldom	Sometimes	Sometimes	Frequently	Seldom	Sometimes	Frequently	Sometimes	Seldom	Seldom	Sometimes	Sometimes	Frequently	Frequently	Seldom	Seldom	Seldom	Sometimes	No	Yes	Yes	No	Yes	Yes	Yes	Yes	Yes	Yes
2021-12-22 21:52:18	Yes	42	Female	Urban	Egypt	Medicine	Postgraduate		Others	Family	With friends	No	No	Sometimes	Frequently	Frequently	Frequently	Frequently	Sometimes	Seldom	Frequently	Seldom	Seldom	Sometimes	Sometimes	Seldom	Seldom	Sometimes	Sometimes	Seldom	Seldom	Seldom	Seldom	Frequently	Frequently	Sometimes	Seldom	Frequently	Frequently	No	No	No	No	No	Yes	Yes	No	No	No
2021-12-22 22:03:28	Yes	41	Female	Urban	Egypt	Medicine	Postgraduate		Others	Family	Alone	No	No	Sometimes	Seldom	Sometimes	Seldom	Seldom	Sometimes	Seldom	Seldom	Seldom	Seldom	Seldom	Sometimes	Seldom	Sometimes	Seldom	Sometimes	Sometimes	Sometimes	Frequently	Sometimes	Sometimes	Sometimes	Seldom	Sometimes	Seldom	Seldom	No	No	No	No	No	No	No	No	No	No
2021-12-22 22:16:06	Yes	23	Female	Rural	Egypt	Others	Postgraduate		Others	Family	Alone	Yes	Others	Seldom	Sometimes	Seldom	Sometimes	Seldom	Seldom	Seldom	Frequently	Seldom	Frequently	Seldom	Seldom	Seldom	Seldom	Seldom	Sometimes	Seldom	Sometimes	Sometimes	Frequently	Sometimes	Seldom	Seldom	Seldom	Seldom	Seldom	No	No	No	No	No	Yes	No	No	Yes	No
2021-12-22 23:05:45	Yes	70	Female	Urban	Egypt	Medicine	Postgraduate	Bachelor of Medicine and Surgery	Forensic	Anther city	With friends	Yes	Hypertension	Seldom	Seldom	Seldom	Sometimes	Seldom	Seldom	Seldom	Seldom	Seldom	Seldom	Seldom	Seldom	Seldom	Seldom	Seldom	Seldom	Seldom	Seldom	Seldom	Seldom	Seldom	Seldom	Seldom	Seldom	Seldom	Seldom	No	No	No	No	No	No	No	No	No	No
2021-12-22 23:38:25	No	21	Male	Urban	Others	Pharmacy	Undergraduate	4	Pharmacy	Family	With friends	No	No	Sometimes	Frequently	Frequently	Sometimes	Sometimes	Sometimes	Seldom	Sometimes	Seldom	Sometimes	Seldom	Sometimes	Seldom	Frequently	Sometimes	Sometimes	Sometimes	Frequently	Frequently	Seldom	Seldom	Sometimes	Sometimes	Seldom	Frequently	Frequently	No	No	Yes	No	No	No	No	Yes	No	Yes
2021-12-22 23:46:41	Yes	33	Female	Rural	Egypt	Medicine	Postgraduate		Others	Family	Alone	No	No	Sometimes	Sometimes	Sometimes	Sometimes	Sometimes	Sometimes	Sometimes	Sometimes	Sometimes	Sometimes	Frequently	Frequently	Sometimes	Sometimes	Sometimes	Sometimes	Sometimes	Sometimes	Frequently	Frequently	Sometimes	Sometimes	Sometimes	Sometimes	Sometimes	Sometimes	Yes	No	No	No	Yes	No	No	No	Yes	No
2021-12-23 20:09:30	Yes	27	Female	Urban	Egypt	Medicine	Postgraduate		Others	Anther city	Alone	No	No	Seldom	Sometimes	Sometimes	Sometimes	Seldom	Seldom	Seldom	Sometimes	Seldom	Sometimes	Seldom	Sometimes	Sometimes	Frequently	Seldom	Sometimes	Sometimes	Sometimes	Sometimes	Frequently	Sometimes	Seldom	Sometimes	Sometimes	Seldom	Seldom	Yes	Yes	No	No	No	Yes	Yes	Yes	Yes	Yes
2021-12-23 20:37:15	Yes	21	Female	Urban	Egypt	Medicine	Undergraduate	Fourth grade	Others	Family	With friends	Yes	Others	Frequently	Frequently	Frequently	Sometimes	Sometimes	Sometimes	Frequently	Frequently	Sometimes	Frequently	Sometimes	Sometimes	Sometimes	Frequently	Seldom	Frequently	Sometimes	Sometimes	Seldom	Sometimes	Frequently	Sometimes	Seldom	Seldom	Sometimes	Seldom	No	No	No	No	No	No	Yes	No	No	Yes
2021-12-23 20:39:04	Yes	21	Male	Urban	Egypt	Medicine	Undergraduate	4 year	Others	Family	With friends	No	No	Sometimes	Seldom	Sometimes	Sometimes	Sometimes	Sometimes	Sometimes	Sometimes	Seldom	Sometimes	Sometimes	Sometimes	Sometimes	Sometimes	Sometimes	Frequently	Frequently	Sometimes	Frequently	Sometimes	Sometimes	Sometimes	Seldom	Sometimes	Sometimes	Sometimes	No	Yes	Yes	No	No	Yes	No	Yes	No	No
2021-12-23 21:24:45	Yes	21	Male	Urban	Egypt	Medicine	Undergraduate	4th level	Others	Family	With friends	No	No	Seldom	Seldom	Seldom	Seldom	Seldom	Seldom	Seldom	Sometimes	Sometimes	Seldom	Seldom	Seldom	Seldom	Seldom	Seldom	Sometimes	Sometimes	Sometimes	Seldom	Sometimes	Sometimes	Seldom	Sometimes	Sometimes	Sometimes	Sometimes	Yes	Yes	No	Yes	No	Yes	No	No	No	Yes
2021-12-24 00:12:02	Yes	28	Female	Urban	Egypt	Medicine	Postgraduate		Others	Family	With friends	No	No	Sometimes	Sometimes	Frequently	Frequently	Frequently	Frequently	Frequently	Frequently	Sometimes	Seldom	Sometimes	Sometimes	Sometimes	Frequently	Seldom	Frequently	Frequently	Frequently	Frequently	Sometimes	Frequently	Sometimes	Frequently	Frequently	Seldom	Sometimes	No	No	Yes	No	No	Yes	Yes	Yes	No	No
2021-12-24 00:22:38	Yes	21	Female	Urban	Egypt	Medicine	Undergraduate	4th year		Family	Alone	No	No	Sometimes	Sometimes	Sometimes	Sometimes	Sometimes	Sometimes	Sometimes	Frequently	Frequently	Sometimes	Sometimes	Sometimes	Seldom	Sometimes	Seldom	Seldom	Sometimes	Sometimes	Sometimes	Sometimes	Sometimes	Sometimes	Sometimes	Sometimes	Sometimes	Sometimes	Yes	No	No	No	No	Yes	No	No	No	Yes
2021-12-24 07:34:56	Yes	21	Male	Urban	Egypt	Others	Undergraduate	forth	Others	Anther city	Alone	No	No	Sometimes	Sometimes	Sometimes	Seldom	Frequently	Sometimes	Sometimes	Sometimes	Sometimes	Sometimes	Sometimes	Sometimes	Sometimes	Seldom	Seldom	Sometimes	Seldom	Frequently	Seldom	Frequently	Sometimes	Sometimes	Sometimes	Frequently	Sometimes	Sometimes	Yes	Yes	No	No	No	Yes	No	Yes	Yes	No
2021-12-24 10:51:50	Yes	21	Male	Urban	Egypt	Physiotherapy	Undergraduate		Physiotherapy	Anther city	With friends	No	No	Sometimes	Sometimes	Seldom	Sometimes	Sometimes	Seldom	Seldom	Sometimes	Seldom	Sometimes	Frequently	Seldom	Seldom	Seldom	Seldom	Seldom	Seldom	Seldom	Seldom	Seldom	Seldom	Sometimes	Sometimes	Seldom	Seldom	Seldom	No	No	Yes	No	No	Yes	Yes	No	Yes	No
2021-12-24 14:15:46	Yes	22	Female	Rural	Egypt	Others	Undergraduate	5	Others	Anther city	Alone	No	No	Sometimes	Sometimes	Sometimes	Sometimes	Seldom	Frequently	Frequently	Frequently	Frequently	Frequently	Frequently	Frequently	Seldom	Sometimes	Seldom	Frequently	Sometimes	Sometimes	Frequently	Seldom	Seldom	Sometimes	Frequently	Sometimes	Sometimes	Sometimes	No	No	Yes	No	Yes	No	No	No	No	No
2021-12-25 03:11:41	Yes	38	Female	Urban	Egypt	Pharmacy	Postgraduate		Others	Family	Alone	No	No	Sometimes	Sometimes	Sometimes	Sometimes	Sometimes	Sometimes	Sometimes	Sometimes	Sometimes	Sometimes	Sometimes	Sometimes	Sometimes	Sometimes	Sometimes	Sometimes	Sometimes	Sometimes	Sometimes	Sometimes	Sometimes	Sometimes	Sometimes	Sometimes	Sometimes	Sometimes	Yes	Yes	No	Yes	No	No	Yes	Yes	Yes	Yes
2021-12-29 12:32:52	Yes	37	Female	Rural	Egypt	Medicine	Postgraduate		Others	Family	With friends	No	No	Sometimes	Sometimes	Sometimes	Sometimes	Seldom	Seldom	Seldom	Sometimes	Seldom	Seldom	Seldom	Seldom	Seldom	Seldom	Seldom	Seldom	Seldom	Seldom	Sometimes	Sometimes	Seldom	Sometimes	Sometimes	Sometimes	Seldom	Seldom	No	No	No	No	No	Yes	No	Yes	No	No
2022-03-07 00:15:36	Yes	37	Female	Urban	Egypt	Medicine	Postgraduate	High school	Others	Family	Alone	No	No	Sometimes	Sometimes	Sometimes	Sometimes	Seldom	Frequently	Frequently	Frequently	Frequently	Frequently	Sometimes	Sometimes	Sometimes	Frequently	Sometimes	Sometimes	Frequently	Frequently	Seldom	Frequently	Sometimes	Seldom	Frequently	Frequently	Sometimes	Seldom	Yes	Yes	Yes	Yes	Yes	Yes	No	Yes	No	No
2022-08-20 00:40:45	Yes	21	Male	Rural	Jordon	Medicine	Undergraduate	3		Family	Alone	No	No	Sometimes	Seldom	Frequently	Sometimes	Sometimes	Seldom	Seldom	Seldom	Seldom	Frequently	Sometimes	Sometimes	Sometimes	Seldom	Sometimes	Sometimes	Frequently	Frequently	Sometimes	Sometimes	Frequently	Frequently	Frequently	Sometimes	Sometimes	Seldom	Yes	Yes	Yes	No	Yes	No	Yes	Yes	No	No
2022-08-20 00:50:34	Yes	19	Female	Urban	Jordon	Medicine	Undergraduate	2nd year		Family	Alone	No	No	Sometimes	Seldom	Seldom	Sometimes	Seldom	Seldom	Sometimes	Seldom	Seldom	Seldom	Seldom	Seldom	Seldom	Seldom	Seldom	Sometimes	Seldom	Frequently	Seldom	Frequently	Frequently	Seldom	Seldom	Seldom	Seldom	Seldom	No	Yes	No	No	Yes	Yes	No	No	No	No
2022-08-20 00:57:32	Yes	22	Female	Urban	Jordon	Medicine	Undergraduate	4th year		Family	With friends	No	No	Sometimes	Seldom	Sometimes	Seldom	Sometimes	Seldom	Seldom	Sometimes	Seldom	Sometimes	Sometimes	Seldom	Seldom	Seldom	Seldom	Frequently	Sometimes	Sometimes	Frequently	Sometimes	Sometimes	Sometimes	Sometimes	Sometimes	Seldom	Seldom	No	No	No	No	No	Yes	No	No	No	No
2022-08-20 01:03:52	Yes	20	Female	Urban	Jordon	Medicine	Undergraduate	Second year student	Others	Family	Alone	No	No	Frequently	Sometimes	Frequently	Frequently	Frequently	Frequently	Frequently	Frequently	Frequently	Sometimes	Frequently	Sometimes	Seldom	Seldom	Sometimes	Sometimes	Sometimes	Frequently	Seldom	Frequently	Seldom	Frequently	Frequently	Seldom	Seldom	Frequently	Yes	No	No	No	Yes	Yes	Yes	No	No	No
2022-08-20 01:10:51	Yes	19	Female	Urban	Jordon	Medicine	Undergraduate	Third year	Others	Family	With friends	No	No	Sometimes	Seldom	Seldom	Seldom	Frequently	Sometimes	Seldom	Sometimes	Sometimes	Seldom	Seldom	Seldom	Seldom	Seldom	Seldom	Sometimes	Sometimes	Seldom	Frequently	Sometimes	Sometimes	Seldom	Sometimes	Seldom	Sometimes	Seldom	Yes	No	No	No	No	Yes	No	No	Yes	No
2022-08-20 01:17:52	Yes	20	Female	Urban	Jordon	Medicine	Undergraduate	2		Family	With friends	No	No	Frequently	Sometimes	Frequently	Frequently	Sometimes	Sometimes	Sometimes	Frequently	Sometimes	Frequently	Frequently	Seldom	Seldom	Sometimes	Seldom	Frequently	Frequently	Seldom	Frequently	Frequently	Frequently	Frequently	Frequently	Frequently	Seldom	Sometimes	Yes	No	No	No	No	No	No	No	No	No
2022-08-20 12:25:10	Yes	20	Female	Rural	Jordon	Medicine	Undergraduate			Anther city	With friends	No	No	Frequently	Sometimes	Frequently	Frequently	Frequently	Frequently	Frequently	Frequently	Frequently	Frequently	Frequently	Frequently	Frequently	Frequently	Frequently	Frequently	Seldom	Frequently	Frequently	Frequently	Frequently	Frequently	Frequently	Seldom	Seldom	Seldom	No	Yes	Yes	No	Yes	No	No	No	Yes	Yes
2022-08-20 12:45:36	Yes	19	Female	Urban	Jordon	Others	Undergraduate	2	Others	Family	Alone	Yes	Others	Seldom	Seldom	Seldom	Sometimes	Seldom	Seldom	Seldom	Frequently	Seldom	Sometimes	Seldom	Frequently	Sometimes	Sometimes	Seldom	Frequently	Seldom	Sometimes	Frequently	Seldom	Sometimes	Frequently	Seldom	Seldom	Seldom	Seldom	No	No	No	No	No	Yes	Yes	No	Yes	No
2022-08-21 11:32:31	Yes	19	Female	Urban	Jordon	Others	Undergraduate	Second year	Others	Family	With friends	No	No	Sometimes	Seldom	Sometimes	Seldom	Seldom	Seldom	Seldom	Sometimes	Seldom	Seldom	Sometimes	Seldom	Sometimes	Seldom	Seldom	Seldom	Sometimes	Seldom	Frequently	Frequently	Sometimes	Seldom	Frequently	Sometimes	Seldom	Seldom	Yes	No	No	No	No	Yes	Yes	No	No	Yes
2022-08-23 20:25:39	Yes	20	Female	Urban	Jordon	Medicine	Undergraduate	Second year	Others	Family	Alone	No	No	Sometimes	Sometimes	Seldom	Seldom	Seldom	Seldom	Sometimes	Frequently	Sometimes	Seldom	Seldom	Sometimes	Seldom	Seldom	Seldom	Seldom	Sometimes	Seldom	Sometimes	Frequently	Frequently	Sometimes	Seldom	Seldom	Seldom	Seldom	No	No	Yes	No	No	Yes	No	No	No	No
2022-09-08 22:01:31	Yes	20	Female	City	Jordan	Medicine	Undergraduate	3	Student	Family		No	No	Sometimes	Frequently	Sometimes	Sometimes	Rarely	Sometimes	Frequently	Frequently	Sometimes	Frequently	Sometimes	Sometimes	Rarely	Sometimes	Sometimes	Sometimes	Frequently	Frequently	Rarely	Frequently	Frequently	Frequently	Sometimes	Frequently	Sometimes	Rarely	No	No	No	No	Yes	Yes	Yes	No	No	No
2022-09-08 22:01:55	Yes	20	Female	City	Jordan	Medicine	Undergraduate	3rd year	Student	Family	With friends	No	No	Sometimes	Rarely	Rarely	Sometimes	Sometimes	Rarely	Sometimes	Sometimes	Sometimes	Sometimes	Sometimes	Sometimes	Sometimes	Sometimes	Sometimes	Sometimes	Sometimes	Sometimes	Sometimes	Sometimes	Sometimes	Sometimes	Sometimes	Sometimes	Sometimes	Sometimes	No	Yes	No	No	Yes	Yes	Yes	Yes	No	No
2022-09-08 22:02:07	Yes	21	Male	City	Jordan	Medicine	Undergraduate	4	Student	Family		No	No	Frequently	Rarely	Sometimes	Sometimes	Frequently	Sometimes	Sometimes	Sometimes	Sometimes	Rarely	Rarely	Rarely	Rarely	Rarely	Sometimes	Frequently	Frequently	Frequently	Rarely	Frequently	Rarely	Rarely	Rarely	Rarely	Sometimes	Frequently	Yes	Yes	No	No	No	No	No	Yes	No	Yes
2022-09-08 22:09:34	Yes	20	Male	City	Jordan	Medicine	Undergraduate	Medicine	Student	Family		No	No	Sometimes	Sometimes	Sometimes	Rarely	Sometimes	Sometimes	Rarely	Rarely	Rarely	Rarely	Sometimes	Rarely	Sometimes	Frequently	Rarely	Frequently	Rarely	Rarely	Sometimes	Sometimes	Frequently	Sometimes	Rarely	Sometimes	Rarely	Rarely	Yes	No	No	No	Yes	No	No	No	No	No
2022-09-08 22:09:38	No	19	Female	Countryside	Jordan	Medicine	Undergraduate	1	Student	Family	With friends	No	No	Sometimes	Rarely	Sometimes	Rarely	Rarely	Rarely	Rarely	Rarely	Rarely	Rarely	Rarely	Rarely	Rarely	Rarely	Rarely	Rarely	Rarely	Rarely	Rarely	Rarely	Rarely	Rarely	Rarely	Rarely	Rarely	Rarely	Yes	Yes	No	No	No	Yes	No	Yes	No	Yes
2022-09-08 22:11:09	Yes	20	Female	City	Jordan	Medicine	Undergraduate	First year	Student	Family		No	No	Sometimes	Sometimes	Rarely	Sometimes	Rarely	Rarely	Sometimes	Sometimes	Sometimes	Frequently	Sometimes	Sometimes	Frequently	Rarely	Rarely	Rarely	Rarely	Rarely	Rarely	Frequently	Frequently	Sometimes	Sometimes	Frequently	Rarely	Rarely	No	Yes	No	No	No	Yes	Yes	No	No	No
2022-09-08 22:11:34	Yes	21	Male	Countryside	Jordan	Medicine	Undergraduate	3	Student	Family		No	No	Sometimes	Sometimes	Rarely	Sometimes	Sometimes	Rarely	Rarely	Rarely	Rarely	Rarely	Rarely	Rarely	Sometimes	Rarely	Sometimes	Frequently	Frequently	Sometimes	Sometimes	Sometimes	Sometimes	Sometimes	Frequently	Frequently	Sometimes	Rarely	Yes	No	No	No	No	Yes	Yes	No	Yes	Yes
2022-09-08 22:12:26	Yes	20	Female	City	Jordan	Medicine	Undergraduate	3	Student	Family		No	No	Sometimes	Sometimes	Rarely	Sometimes	Frequently	Sometimes	Frequently	Sometimes	Sometimes	Rarely	Sometimes	Sometimes	Rarely	Rarely	Rarely	Sometimes	Sometimes	Sometimes	Sometimes	Rarely	Rarely	Rarely	Sometimes	Sometimes	Rarely	Sometimes	No	No	No	No	No	Yes	No	No	Yes	No
2022-09-08 22:12:49	Yes	21	Male	City	Jordan	Medicine	Undergraduate	4th year	Student	Family	With friends	No	No	Rarely	Rarely	Sometimes	Sometimes	Rarely	Rarely	Rarely	Rarely	Rarely	Sometimes	Rarely	Rarely	Sometimes	Rarely	Rarely	Sometimes	Rarely	Sometimes	Rarely	Frequently	Rarely	Rarely	Sometimes	Rarely	Rarely	Rarely	Yes	Yes	No	No	Yes	Yes	No	Yes	No	No
2022-09-08 22:16:59	Yes	21	Female	City	Jordan	Medicine	Undergraduate	4	Student	Family	Alone	Yes	No	Rarely	Rarely	Rarely	Rarely	Rarely	Sometimes	Rarely	Rarely	Rarely	Rarely	Rarely	Rarely	Rarely	Rarely	Rarely	Rarely	Rarely	Rarely	Rarely	Rarely	Rarely	Rarely	Rarely	Rarely	Rarely	Rarely	Yes	Yes	Yes	Yes	Yes	Yes	Yes	Yes	Yes	Yes
2022-09-08 22:20:45	Yes	20	Female	Countryside	Jordan	Medicine	Undergraduate	Second Year	Student	Family	With friends	No	No	Frequently	Sometimes	Sometimes	Sometimes	Frequently	Frequently	Frequently	Frequently	Frequently	Sometimes	Frequently	Sometimes	Sometimes	Sometimes	Sometimes	Sometimes	Sometimes	Frequently	Frequently	Frequently	Rarely	Frequently	Sometimes	Sometimes	Sometimes	Frequently	No	Yes	Yes	Yes	Yes	Yes	Yes	Yes	No	No
2022-09-08 22:21:09	Yes	21	Male	Countryside	Jordan	Medicine	Undergraduate	Fourth	Student	Family		No	No	Frequently	Rarely	Rarely	Rarely	Rarely	Rarely	Sometimes	Rarely	Rarely	Sometimes	Frequently	Sometimes	Rarely	Rarely	Sometimes	Sometimes	Rarely	Rarely	Frequently	Frequently	Sometimes	Rarely	Sometimes	Sometimes	Rarely	Sometimes	Yes	Yes	No	Yes	Yes	Yes	No	No	No	No
2022-09-08 22:22:42	Yes	19	Female	City	Jordan	Medicine	Undergraduate	First	Student	Family		No	No	Rarely	Rarely	Sometimes	Sometimes	Rarely	Sometimes	Sometimes	Rarely	Rarely	Sometimes	Sometimes	Sometimes	Sometimes	Rarely	Rarely	Frequently	Rarely	Rarely	Frequently	Sometimes	Sometimes	Sometimes	Sometimes	Sometimes	Rarely	Rarely	No	Yes	No	No	Yes	No	No	No	No	No
2022-09-08 22:23:28	Yes	20	Female	City	Jordan	Medicine	Undergraduate	2	Student	Family	Alone	No	No	Sometimes	Sometimes	Sometimes	Rarely	Sometimes	Sometimes	Sometimes	Sometimes	Sometimes	Rarely	Rarely	Rarely	Rarely	Rarely	Rarely	Sometimes	Sometimes	Rarely	Rarely	Sometimes	Rarely	Rarely	Rarely	Rarely	Rarely	Rarely	Yes	Yes	No	No	No	Yes	No	No	No	No
2022-09-08 22:24:25	Yes	19	Female	Countryside	Jordan	Medicine	Undergraduate			Family		No	No	Sometimes	Sometimes	Frequently	Sometimes	Sometimes	Sometimes	Frequently	Sometimes	Frequently	Frequently	Frequently	Frequently	Frequently	Sometimes	Sometimes	Sometimes	Frequently	Sometimes	Frequently	Frequently	Frequently	Sometimes	Frequently	Sometimes	Rarely	Sometimes	Yes	Yes	No	No	Yes	Yes	Yes	Yes	Yes	Yes
2022-09-08 22:37:55	Yes	21	Male	City	Jordan	Medicine	Undergraduate	4	Student	Family		No	No	Sometimes	Rarely	Rarely	Sometimes	Rarely	Rarely	Frequently	Frequently	Frequently	Frequently	Frequently	Rarely	Rarely	Rarely	Sometimes	Sometimes	Sometimes	Rarely	Sometimes	Rarely	Rarely	Rarely	Sometimes	Rarely	Rarely	Rarely	No	No	No	No	Yes	Yes	No	Yes	Yes	No
2022-09-08 22:40:44	Yes	20	Male	City	Jordan	Medicine	Undergraduate	4	Student	Family		No	No	Sometimes	Rarely	Sometimes	Rarely	Rarely	Frequently	Sometimes	Sometimes	Frequently	Frequently	Frequently	Rarely	Rarely	Rarely	Rarely	Frequently	Rarely	Rarely	Frequently	Frequently	Sometimes	Rarely	Frequently	Sometimes	Sometimes	Sometimes	Yes	Yes	No	Yes	Yes	Yes	No	No	No	Yes
2022-09-08 22:43:01	Yes	19	Female	City	Jordan	Medicine	Undergraduate	1st		Family		No	No	Frequently	Rarely	Sometimes	Rarely	Rarely	Rarely	Rarely	Sometimes	Rarely	Sometimes	Rarely	Rarely	Sometimes	Frequently	Rarely	Frequently	Rarely	Rarely	Frequently	Frequently	Rarely	Sometimes	Rarely	Rarely	Sometimes	Rarely	Yes	Yes	No	No	Yes	No	Yes	No	No	No
2022-09-08 22:44:05	Yes	21	Female	City	Jordan	Medicine	Undergraduate	3	Student	Family		No	No	Rarely	Rarely	Frequently	Rarely	Sometimes	Sometimes	Rarely	Sometimes	Sometimes	Sometimes	Rarely	Sometimes	Rarely	Sometimes	Sometimes	Frequently	Frequently	Sometimes	Frequently	Frequently	Rarely	Frequently	Sometimes	Frequently	Rarely	Rarely	Yes	Yes	Yes	No	Yes	Yes	Yes	Yes	Yes	Yes
2022-09-08 22:44:22	Yes	20	Female	City	Jordan	Medicine	Undergraduate	2	Student	Family		No	No	Rarely	Rarely	Frequently	Sometimes	Sometimes	Sometimes	Sometimes	Sometimes	Sometimes	Sometimes	Sometimes	Sometimes	Rarely	Rarely	Sometimes	Rarely	Rarely	Sometimes	Sometimes	Rarely	Rarely	Sometimes	Sometimes	Sometimes	Rarely	Sometimes	No	No	No	No	No	Yes	No	Yes	No	No
2022-09-08 22:44:25	Yes	20	Female	City	Jordan	Medicine	Undergraduate	First year	Student	Family		No	No	Frequently	Rarely	Sometimes	Rarely	Sometimes	Rarely	Rarely	Sometimes	Rarely	Rarely	Rarely	Sometimes	Sometimes	Sometimes	Sometimes	Rarely	Rarely	Rarely	Frequently	Frequently	Rarely	Sometimes	Sometimes	Rarely	Sometimes	Sometimes	Yes	No	No	No	Yes	Yes	No	No	No	No
2022-09-08 22:45:02	Yes	19	Female	City	Others	Medicine	Undergraduate	Second year	Student	Family	Alone	No	No	Rarely	Rarely	Rarely	Sometimes	Rarely	Rarely	Rarely	Rarely	Rarely	Sometimes	Rarely	Rarely	Rarely	Rarely	Rarely	Sometimes	Rarely	Rarely	Sometimes	Sometimes	Rarely	Rarely	Rarely	Sometimes	Rarely	Rarely	No	No	No	No	No	Yes	No	No	No	No
2022-09-08 22:59:57	Yes	19	Female	City	Jordan	Medicine	Undergraduate	3	Student	Family		No	No	Sometimes	Rarely	Rarely	Rarely	Rarely	Rarely	Rarely	Sometimes	Sometimes	Rarely	Rarely	Rarely	Rarely	Rarely	Rarely	Rarely	Rarely	Rarely	Sometimes	Rarely	Rarely	Rarely	Rarely	Rarely	Sometimes	Rarely	No	No	No	No	Yes	Yes	No	Yes	No	No
2022-09-08 23:08:03	Yes	21	Male	City	Jordan	Medicine	Undergraduate	3	Student	Family		No	No	Sometimes	Frequently	Frequently	Rarely	Rarely	Frequently	Sometimes	Rarely	Sometimes	Sometimes	Rarely	Frequently	Sometimes	Sometimes	Sometimes	Rarely	Frequently	Sometimes	Sometimes	Rarely	Frequently	Frequently	Frequently	Rarely	Frequently	Frequently	No	No	Yes	No	Yes	Yes	No	No	Yes	No
2022-09-08 23:09:30	Yes	21	Female	City	Jordan	Medicine	Undergraduate	4	Student	Family		No	No	Sometimes	Rarely	Sometimes	Rarely	Rarely	Rarely	Rarely	Rarely	Rarely	Rarely	Rarely	Rarely	Rarely	Rarely	Rarely	Rarely	Sometimes	Rarely	Sometimes	Frequently	Rarely	Rarely	Frequently	Rarely	Rarely	Rarely	No	No	No	No	No	Yes	No	No	No	No
2022-09-08 23:17:20	Yes	19	Female	City	Jordan	Medicine	Undergraduate	3	Student	Family		No	No	Rarely	Sometimes	Sometimes	Rarely	Sometimes	Sometimes	Rarely	Rarely	Frequently	Sometimes	Sometimes	Frequently	Frequently	Frequently	Frequently	Frequently	Sometimes	Sometimes	Frequently	Frequently	Rarely	Rarely	Sometimes	Sometimes	Rarely	Rarely	No	No	No	Yes	Yes	No	Yes	No	Yes	No
2022-09-08 23:22:07	Yes	19	Female	City	Jordan	Medicine	Undergraduate	2	Student	Family		No	No	Rarely	Rarely	Rarely	Rarely	Rarely	Rarely	Rarely	Rarely	Rarely	Rarely	Rarely	Rarely	Rarely	Rarely	Rarely	Rarely	Rarely	Rarely	Rarely	Rarely	Rarely	Rarely	Rarely	Rarely	Rarely	Rarely	No	No	No	No	No	Yes	No	Yes	No	No
2022-09-08 23:23:36	Yes	20	Male	City	Jordan	Medicine	Undergraduate	3rd	Student	Family		No	No	Sometimes	Rarely	Frequently	Sometimes	Sometimes	Frequently	Rarely	Frequently	Sometimes	Sometimes	Sometimes	Rarely	Rarely	Rarely	Sometimes	Sometimes	Rarely	Rarely	Rarely	Rarely	Rarely	Frequently	Sometimes	Rarely	Sometimes	Frequently	No	Yes	No	No	No	No	No	No	No	No
2022-09-08 23:28:20	Yes	20	Male	City	Jordan	Medicine	Undergraduate	2	Student	Family		No	No	Sometimes	Rarely	Rarely	Sometimes	Rarely	Rarely	Sometimes	Sometimes	Sometimes	Rarely	Rarely	Rarely	Rarely	Rarely	Rarely	Sometimes	Sometimes	Sometimes	Rarely	Sometimes	Rarely	Sometimes	Rarely	Sometimes	Rarely	Sometimes	Yes	Yes	No	No	Yes	Yes	No	No	Yes	Yes
2022-09-08 23:30:13	Yes	21	Female	City	Jordan	Medicine	Undergraduate	3rd year	Student	Family		No	No	Sometimes	Rarely	Frequently	Frequently	Rarely	Rarely	Frequently	Sometimes	Frequently	Sometimes	Rarely	Rarely	Rarely	Sometimes	Rarely	Sometimes	Sometimes	Frequently	Rarely	Frequently	Frequently	Frequently	Rarely	Sometimes	Rarely	Rarely	No	No	No	No	Yes	No	No	No	No	No
2022-09-08 23:33:48	Yes	20	Female	City	Jordan	Medicine	Undergraduate	1st	Student	Family		No	No	Rarely	Rarely	Rarely	Rarely	Rarely	Rarely	Sometimes	Sometimes	Rarely	Sometimes	Sometimes	Rarely	Frequently	Sometimes	Rarely	Rarely	Rarely	Rarely	Rarely	Sometimes	Rarely	Rarely	Rarely	Sometimes	Rarely	Rarely	No	No	No	Yes	No	Yes	No	No	Yes	No
2022-09-08 23:33:54	Yes	19	Female	City	Jordan	Medicine	Undergraduate	First year	Student	Family	Alone	No	No	Sometimes	Sometimes	Sometimes	Frequently	Frequently	Sometimes	Sometimes	Frequently	Sometimes	Rarely	Sometimes	Rarely	Rarely	Sometimes	Sometimes	Sometimes	Sometimes	Sometimes	Sometimes	Frequently	Sometimes	Frequently	Sometimes	Sometimes	Rarely	Sometimes	No	No	No	No	No	Yes	No	No	No	No
2022-09-08 23:53:54	Yes	19	Female	Countryside	Jordan	Medicine	Undergraduate	Second year	Student	Family		No	No	Frequently	Frequently	Sometimes	Sometimes	Sometimes	Sometimes	Sometimes	Rarely	Rarely	Sometimes	Sometimes	Rarely	Rarely	Rarely	Rarely	Frequently	Sometimes	Sometimes	Sometimes	Frequently	Rarely	Sometimes	Sometimes	Sometimes	Sometimes	Sometimes	Yes	Yes	No	No	Yes	Yes	Yes	No	No	Yes
2022-09-09 00:32:47	Yes	19	Male	City	Jordan	Medicine	Undergraduate	2	Student	Family	Alone	Yes	Others	Rarely	Rarely	Frequently	Frequently	Frequently	Rarely	Frequently	Frequently	Rarely	Frequently	Rarely	Rarely	Rarely	Frequently	Frequently	Rarely	Frequently	Sometimes	Rarely	Sometimes	Frequently	Rarely	Rarely	Frequently	Rarely	Frequently	No	No	No	No	No	Yes	Yes	Yes	No	No
2022-09-09 01:07:54	Yes	19	Male	City	Jordan	Medicine	Postgraduate	2	Student	Family		Yes	Diabetes	Rarely	Rarely	Rarely	Sometimes	Rarely	Sometimes	Rarely	Sometimes	Rarely	Sometimes	Rarely	Rarely	Rarely	Rarely	Sometimes	Rarely	Rarely	Sometimes	Rarely	Frequently	Rarely	Rarely	Sometimes	Rarely	Rarely	Rarely	Yes	Yes	Yes	Yes	Yes	Yes	No	Yes	No	No
2022-09-09 02:12:34	Yes	19	Female	City	Jordan	Medicine	Undergraduate	1st	Student	Another city	Alone	No	No	Sometimes	Rarely	Sometimes	Sometimes	Sometimes	Sometimes	Rarely	Frequently	Frequently	Rarely	Rarely	Rarely	Rarely	Rarely	Rarely	Rarely	Sometimes	Rarely	Sometimes	Sometimes	Rarely	Sometimes	Sometimes	Rarely	Rarely	Rarely	Yes	No	No	No	No	Yes	No	No	No	No
2022-09-09 02:23:03	Yes	20	Female	City	Jordan	Medicine	Undergraduate	2	Student	Family		No	No	Sometimes	Rarely	Sometimes	Sometimes	Sometimes	Sometimes	Sometimes	Frequently	Frequently	Frequently	Sometimes	Sometimes	Rarely	Sometimes	Sometimes	Frequently	Sometimes	Sometimes	Frequently	Frequently	Sometimes	Sometimes	Sometimes	Sometimes	Rarely	Rarely	Yes	No	No	No	Yes	Yes	No	No	Yes	No
2022-09-09 02:36:15	Yes	19	Female	City	Jordan	Medicine	Undergraduate	1	Student	Family		No	No	Sometimes	Sometimes	Frequently	Sometimes	Frequently	Sometimes	Rarely	Sometimes	Sometimes	Rarely	Sometimes	Rarely	Rarely	Sometimes	Rarely	Sometimes	Rarely	Sometimes	Sometimes	Frequently	Sometimes	Frequently	Sometimes	Sometimes	Rarely	Sometimes	No	Yes	No	No	No	Yes	Yes	Yes	No	Yes
2022-09-09 05:41:44	Yes	20	Female	City	Jordan	Medicine	Undergraduate	3	Student	Family		No	No	Rarely	Rarely	Sometimes	Rarely	Rarely	Rarely	Rarely	Sometimes	Rarely	Sometimes	Rarely	Rarely	Rarely	Rarely	Rarely	Sometimes	Rarely	Rarely	Rarely	Rarely	Rarely	Rarely	Rarely	Rarely	Rarely	Rarely	No	No	No	No	No	Yes	No	No	No	No
2022-09-09 06:30:14	Yes	19	Female	City	Jordan	Medicine	Undergraduate	1	Student	Family		No	No	Sometimes	Rarely	Frequently	Sometimes	Frequently	Sometimes	Rarely	Sometimes	Rarely	Sometimes	Sometimes	Sometimes	Rarely	Sometimes	Rarely	Frequently	Rarely	Rarely	Sometimes	Sometimes	Rarely	Sometimes	Sometimes	Frequently	Sometimes	Sometimes	No	No	No	No	No	Yes	No	Yes	No	No
2022-09-09 06:30:41	Yes	19	Male	City	Jordan	Medicine	Undergraduate	First year	Student	Family		No	No	Rarely	Rarely	Sometimes	Rarely	Sometimes	Rarely	Sometimes	Sometimes	Sometimes	Sometimes	Rarely	Rarely	Rarely	Rarely	Rarely	Rarely	Rarely	Rarely	Rarely	Sometimes	Rarely	Rarely	Sometimes	Rarely	Rarely	Rarely	No	Yes	No	No	No	Yes	No	Yes	No	No
2022-09-09 08:54:57	Yes	21	Male	City	Jordan	Medicine	Undergraduate	4th year	Student	Family		No	No	Sometimes	Rarely	Rarely	Sometimes	Rarely	Sometimes	Sometimes	Frequently	Rarely	Sometimes	Rarely	Sometimes	Sometimes	Rarely	Rarely	Sometimes	Sometimes	Sometimes	Rarely	Rarely	Rarely	Rarely	Sometimes	Rarely	Rarely	Rarely	Yes	No	Yes	No	Yes	Yes	Yes	Yes	No	No
2022-09-09 09:37:45	Yes	19	Female	City	Jordan	Medicine	Undergraduate	Year 2	Student	Family		No	No	Frequently	Sometimes	Sometimes	Frequently	Rarely	Sometimes	Frequently	Sometimes	Rarely	Frequently	Sometimes	Sometimes	Rarely	Rarely	Sometimes	Sometimes	Rarely	Rarely	Rarely	Rarely	Sometimes	Frequently	Frequently	Frequently	Frequently	Rarely	No	No	No	No	No	Yes	No	No	No	No
2022-09-09 09:43:22	Yes	20	Male	City	Jordan	Medicine	Undergraduate	3	Student	Family		No	No	Rarely	Sometimes	Frequently	Sometimes	Frequently	Sometimes	Sometimes	Frequently	Frequently	Frequently	Frequently	Sometimes	Frequently	Rarely	Sometimes	Frequently	Sometimes	Sometimes	Rarely	Frequently	Frequently	Frequently	Frequently	Frequently	Sometimes	Sometimes	Yes	No	No	No	No	Yes	Yes	No	Yes	No
2022-09-09 10:11:04	Yes	20	Female	City	Jordan	Medicine	Undergraduate	4	Student	Family		No	No	Sometimes	Rarely	Sometimes	Rarely	Sometimes	Rarely	Rarely	Sometimes	Rarely	Sometimes	Rarely	Rarely	Rarely	Rarely	Rarely	Sometimes	Rarely	Rarely	Rarely	Rarely	Rarely	Rarely	Rarely	Rarely	Rarely	Rarely	No	No	No	No	No	Yes	No	No	No	No
2022-09-09 10:36:07	Yes	18	Female	City	Jordan	Medicine	Undergraduate	2	Student	Family	With friends	No	No	Sometimes	Sometimes	Sometimes	Sometimes	Frequently	Sometimes	Sometimes	Rarely	Rarely	Rarely	Sometimes	Rarely	Rarely	Rarely	Sometimes	Rarely	Rarely	Rarely	Rarely	Sometimes	Rarely	Sometimes	Sometimes	Rarely	Rarely	Sometimes	No	No	No	No	No	No	Yes	Yes	Yes	No
2022-09-09 10:38:45	Yes	19	Female	City	Jordan	Medicine	Undergraduate	2	Student	Family		No	No	Sometimes	Sometimes	Sometimes	Sometimes	Rarely	Rarely	Rarely	Sometimes	Rarely	Rarely	Rarely	Rarely	Sometimes	Rarely	Rarely	Rarely	Rarely	Rarely	Rarely	Rarely	Sometimes	Frequently	Rarely	Rarely	Rarely	Sometimes	Yes	Yes	No	Yes	No	Yes	Yes	No	No	Yes
2022-09-09 11:06:16	Yes	19	Male	Countryside	Jordan	Medicine	Undergraduate	2	Student	Family		No	No	Sometimes	Sometimes	Sometimes	Rarely	Rarely	Rarely	Rarely	Rarely	Rarely	Rarely	Rarely	Sometimes	Sometimes	Rarely	Rarely	Rarely	Rarely	Rarely	Rarely	Frequently	Sometimes	Rarely	Sometimes	Sometimes	Sometimes	Rarely	Yes	Yes	No	Yes	No	Yes	Yes	Yes	No	No
2022-09-09 13:11:31	Yes	19	Female	City	Jordan	Medicine	Undergraduate	2		Family		No	No	Sometimes	Rarely	Rarely	Sometimes	Sometimes	Rarely	Frequently	Frequently	Sometimes	Frequently	Rarely	Rarely	Frequently	Rarely	Sometimes	Frequently	Rarely	Rarely	Frequently	Sometimes	Rarely	Sometimes	Sometimes	Sometimes	Rarely	Rarely	No	No	No	No	No	No	Yes	No	No	No
2022-09-09 14:35:03	Yes	22	Female	City	Jordan	Medicine	Undergraduate	4th year	Student	Family		No	No	Sometimes	Sometimes	Sometimes	Rarely	Sometimes	Rarely	Sometimes	Sometimes	Rarely	Sometimes	Sometimes	Rarely	Sometimes	Rarely	Rarely	Sometimes	Sometimes	Rarely	Rarely	Sometimes	Sometimes	Sometimes	Sometimes	Sometimes	Rarely	Sometimes	Yes	No	No	No	No	Yes	No	Yes	No	Yes
2022-09-09 15:01:08	Yes	21	Male	City	Jordan	Medicine	Undergraduate	3rd year	Student	Family		No	No	Frequently	Sometimes	Frequently	Sometimes	Frequently	Frequently	Frequently	Sometimes	Frequently	Sometimes	Frequently	Rarely	Rarely	Rarely	Frequently	Rarely	Sometimes	Frequently	Rarely	Frequently	Sometimes	Frequently	Frequently	Frequently	Sometimes	Sometimes	No	Yes	No	No	No	Yes	No	No	No	Yes
2022-09-09 18:21:37	Yes	20	Female	City	Jordan	Medicine	Undergraduate	Second year	Student	Family		No	No	Frequently	Sometimes	Frequently	Sometimes	Rarely	Sometimes	Sometimes	Sometimes	Sometimes	Rarely	Sometimes	Rarely	Rarely	Rarely	Sometimes	Sometimes	Sometimes	Rarely	Sometimes	Rarely	Rarely	Sometimes	Sometimes	Rarely	Rarely	Sometimes	Yes	No	No	No	No	Yes	Yes	No	No	No
2022-09-10 02:42:55	Yes	19	Female	City	Jordan	Medicine	Undergraduate	Done my 1st	Student	Family		Yes	Others	Sometimes	Sometimes	Frequently	Sometimes	Sometimes	Rarely	Rarely	Frequently	Rarely	Frequently	Frequently	Rarely	Rarely	Sometimes	Rarely	Frequently	Frequently	Frequently	Frequently	Frequently	Frequently	Frequently	Sometimes	Frequently	Sometimes	Sometimes	No	No	No	No	Yes	Yes	Yes	No	No	Yes
2022-09-12 11:40:12	Yes	21	Female	City	Jordan	Medicine	Undergraduate	4th year	Student	Family		No	No	Frequently	Sometimes	Frequently	Frequently	Frequently	Frequently	Sometimes	Sometimes	Sometimes	Sometimes	Frequently	Frequently	Sometimes	Sometimes	Sometimes	Sometimes	Rarely	Rarely	Rarely	Sometimes	Sometimes	Frequently	Sometimes	Sometimes	Frequently	Frequently	No	No	No	No	No	Yes	No	No	No	No
2022-11-09 19:29:52	Yes	42	Female	City	Egypt	Medicine	Postgraduate		Physiology	Family		Yes	Hypertension	Rarely	Rarely	Rarely	Rarely	Rarely	Rarely	Sometimes	Rarely	Rarely	Rarely	Rarely	Rarely	Rarely	Rarely	Rarely	Rarely	Rarely	Rarely	Frequently	Frequently	Frequently	Sometimes	Sometimes	Sometimes	Rarely	Sometimes	No	Yes	No	No	No	Yes	Yes	Yes	Yes	Yes
[truncated: 21 more columns]
